# Supplementary material for: Comprehensive analysis of 84 Faecalibacterium prausnitzii strains uncovers their genetic diversity, functional characteristics, and potential risks
Source: Front Cell Infect Microbiol. 2023 Jan 4;12:919701. doi: 10.3389/fcimb.2022.919701 (PMC9846645; doi:10.3389/fcimb.2022.919701)
Supplement: Supplementary file 2 [file DataSheet_2.xlsx]

## Sheet: Table content
Table contents
Table1	The detailed information of 84 F. prausnitzii strains
Table2	Content of pan genes, accessory genes,and unique genes of 84 F. prausnitzii strains
Table3	Distribution of COG categories in F. prausnitzii accessory, core, and unique genome
Table4	The basic CAZyme annotation results of F. prausnitzii
Table5	The detail CAZyme annotation results of F. prausnitzii
Table6	KEGG annotational results of the proteins of 84 F. prausnitzii strains
Table7	Detailed annotational results of the proteins of 84 F. prausnitzii strains against KEGG database by GhostKOALA and KofamKOALA
Table8	Secondary metabolic gene clusters (refer to biosynthesis gene clusters, BGCs) of 84 F. prausnitzii strains
Table9	Fatty acid synthesis related enzymes in F. prausnitzii
Table10	The number of enzymes associated with fatty acid synthesis in F. prausnitzii
Table11	The components of CRISPR–Cas Systems in F. prausnitzii strains
Table12	Details of antibiotic resistance genes (ARGs)
Table13	Quantity of ARGs of these 84 F. prausnitzii strains
Table14	Details of virulence factors (VFs)
Table15	Quantity of VFs of these 84 F. prausnitzii strains
Table16	Details of pathogenic genes (PGs)
Table17	Quantity of PGs of these 84 F. prausnitzii strains
Table18	PPRI, PPRS, and risk evaluate of 84 F. prausnitzii strains
Table19	PPRI processed data

## Sheet: Table1
Supplementary Table 1: The detailed information of 84 F. prausnitzii strains (from NCBI)
Strains	Level of assembly	Size(Mb)	GC%	Scaffolds	Proteins	Host	Bioproject number
F. prausnitzii APC918/95b	Complete	2.97094	56.4	1	2664	Homo sapiens	PRJNA432550
F. prausnitzii A2165	Complete	3.11004	56.3	1	2797	Homo sapiens	PRJNA394904
F. prausnitzii Indica	Complete	2.86893	56.9	1	2587	Homo sapiens	PRJNA413728
F. prausnitzii 942/30-2	Complete	2.83389	57.2	1	2541	Homo sapiens	PRJNA432550
F. prausnitzii MGYG-HGUT-02545	Complete	2.83389	57.2	1	2541	unknown	PRJEB33885
F. prausnitzii KLE1255	Complete	2.92873	56.3	139	2758	Homo sapiens	PRJNA46809
F. prausnitzii SL3/3	Chromosome	3.21442	55.6	1	3008	unknown	PRJNA39151
F. prausnitzii L2/6	Chromosome	3.32137	56.7	1	3044	unknown	PRJNA45961
F. prausnitzii ATCC 27768	Contig	3.03117	56.4	76	2789	Homo sapiens	PRJNA432550
F. prausnitzii P9391	Contig	2.91276	56.6	11	2665	unknown	PRJEB34180
F. prausnitzii P9123	Contig	2.91516	56.8	8	2674	unknown	PRJEB34180
F. prausnitzii P9094	Scaffold	2.91103	56.6	41	2684	unknown	PRJEB34180
F. prausnitzii P9122	Contig	3.19176	56.1	14	2946	unknown	PRJEB34180
F. prausnitzii AHMP21	Contig	3.01932	57.4	85	2824	Homo sapiens	PRJNA395798
F. prausnitzii APC923/61-1	Contig	2.68179	57.4	19	2427	Homo sapiens	PRJNA432550
F. prausnitzii CNCM I 4542	Scaffold	2.91447	55.8	105	2739	Homo sapiens	PRJNA394149
F. prausnitzii P9239	Contig	2.65829	57.6	19	2367	unknown	PRJEB34180
F. prausnitzii MGYG-HGUT-00195	Scaffold	3.3895	56.2	34	3171	unknown	PRJEB33885
F. prausnitzii MGYG-HGUT-01300	Scaffold	3.12738	56.2	25	2855	unknown	PRJEB33885
F. prausnitzii P9238	Scaffold	2.90854	56.6	48	2680	unknown	PRJEB34180
F. prausnitzii APC942/8-14-2	Contig	2.69243	57	28	2456	Homo sapiens	PRJNA432550
F. prausnitzii CNCM I 4574	Scaffold	3.08899	56.3	38	2918	Homo sapiens	PRJNA394160
F. prausnitzii APC942/18-1	Contig	2.79714	57.3	26	2536	Homo sapiens	PRJNA432550
F. prausnitzii CNCM I 4575	Scaffold	3.0066	57.5	37	2786	Homo sapiens	PRJNA394163
F. prausnitzii P9313	Contig	2.68536	57.1	41	2416	unknown	PRJEB34180
F. prausnitzii CNCM I 4543	Scaffold	3.08045	56.2	22	2919	Homo sapiens	PRJNA394152
F. prausnitzii CNCM I 4540	Scaffold	3.04349	55.7	48	2858	Homo sapiens	PRJNA394144
F. prausnitzii P9225	Scaffold	2.84757	56.8	24	2624	unknown	PRJEB34180
F. prausnitzii P9241	Scaffold	2.77966	56.9	37	2501	unknown	PRJEB34180
F. prausnitzii P9311	Scaffold	3.11693	56.5	50	2940	unknown	PRJEB34180
F. prausnitzii MGYG-HGUT-02272	Scaffold	2.83031	56	31	2638	unknown	PRJEB33885
F. prausnitzii AM33-14AC	Scaffold	2.73606	57.3	32	2487	Homo sapiens	PRJNA482748
F. prausnitzii AM42-11AC	Scaffold	2.9698	56.6	31	2779	Homo sapiens	PRJNA482748
F. prausnitzii CNCM I 4573	Scaffold	3.27522	55.9	83	3055	Homo sapiens	PRJNA394159
F. prausnitzii CNCM I 4541	Scaffold	2.82274	58.1	78	2573	Homo sapiens	PRJNA394147
F. prausnitzii AM39-7BH	Scaffold	2.87518	56.7	53	2639	Homo sapiens	PRJNA482748
F. prausnitzii APC923/51-1	Contig	3.03238	56.2	70	2790	Homo sapiens	PRJNA432550
F. prausnitzii CNCM I 4544	Scaffold	2.80325	56	69	2593	Homo sapiens	PRJNA394155
F. prausnitzii AF29-11BH	Scaffold	3.31091	55.8	62	3065	Homo sapiens	PRJNA482748
F. prausnitzii APC942/32-1	Contig	2.9906	57.4	52	2792	Homo sapiens	PRJNA432550
F. prausnitzii AF36-11AT	Scaffold	2.9752	56.6	80	2804	Homo sapiens	PRJNA482748
F. prausnitzii JG_BgPS064	Contig	3.06404	57.2	177	2771	unknown	PRJEB26419
F. prausnitzii BIOML-A1	Scaffold	2.891	56.6	33	2665	Homo sapiens	PRJNA544527
F. prausnitzii P9240	Contig	2.70741	57.1	39	2442	unknown	PRJEB34180
F. prausnitzii AM36-18BH	Scaffold	2.94235	56.3	46	2681	Homo sapiens	PRJNA482748
F. prausnitzii AF10-13	Scaffold	3.12628	56.1	46	2873	Homo sapiens	PRJNA482748
F. prausnitzii FPSSTS7063_SV_a2_mod	Contig	3.08677	57.4	48	2882	unknown	PRJEB27068
F. prausnitzii CNCM I 4546	Scaffold	3.42252	54.9	244	3147	Homo sapiens	PRJNA394156
F. prausnitzii BIOML-B17	Scaffold	3.08587	56.3	62	2829	Homo sapiens	PRJNA544527
F. prausnitzii ATCC 27766	Contig	3.02112	56.5	83	2753	Homo sapiens	PRJNA432550
F. prausnitzii APC924/119	Contig	3.01814	56.4	83	2800	Homo sapiens	PRJNA432550
F. prausnitzii BIOML-B18	Scaffold	3.1163	56.2	62	2851	Homo sapiens	PRJNA544527
F. prausnitzii AHMP21_GCA.002550045	Contig	2.87917	56.8	63	2634	Homo sapiens	PRJNA395799
F. prausnitzii APC922/41-1	Contig	2.79064	57.7	54	2588	Homo sapiens	SAMN08494062
F. prausnitzii AF31-14AC	Scaffold	3.27966	55.7	83	3012	Homo sapiens	PRJNA482748
F. prausnitzii MGYG-HGUT-00022	Scaffold	3.06322	56.4	23	2815	unknown	PRJEB33885
F. prausnitzii AF32-8AC	Scaffold	3.02588	56.8	57	2782	Homo sapiens	PRJNA482748
F. prausnitzii AM37-13AC	Scaffold	2.92197	56.5	61	2644	Homo sapiens	PRJNA482748
F. prausnitzii BIOML-B11	Contig	3.18455	55.9	75	2917	Homo sapiens	PRJNA544527
F. prausnitzii BIOML-B13	Scaffold	3.27765	55.9	65	3069	Homo sapiens	PRJNA544527
F. prausnitzii BIOML-B7	Contig	3.41588	55.4	91	3182	Homo sapiens	PRJNA544527
F. prausnitzii BIOML-B12	Scaffold	3.1908	55.9	71	2937	Homo sapiens	PRJNA544527
F. prausnitzii BIOML-B3	Contig	3.09775	56.2	79	2847	Homo sapiens	PRJNA544527
F. prausnitzii BIOML-B2	Contig	3.10861	56.1	92	2854	Homo sapiens	PRJNA544527
F. prausnitzii BIOML-B10	Scaffold	3.28967	55.9	95	3063	Homo sapiens	PRJNA544527
F. prausnitzii aa_0143	Contig	3.07989	56.2	98	2843	Homo sapiens	PRJNA496358
F. prausnitzii BIOML-B4	Contig	3.06937	56.3	96	2821	Homo sapiens	PRJNA544527
F. prausnitzii BIOML-B6	Scaffold	3.32505	55.8	109	3138	Homo sapiens	PRJNA544527
F. prausnitzii BIOML-B9	Scaffold	3.28651	55.9	88	3056	Homo sapiens	PRJNA544527
F. prausnitzii BIOML-B14	Scaffold	3.30844	55.8	81	3124	Homo sapiens	PRJNA544527
F. prausnitzii BIOML-B8	Scaffold	3.42152	55.4	92	3180	Homo sapiens	PRJNA544527
F. prausnitzii 2789STDY5608869	Scaffold	2.85253	57.7	49	2638	Homo sapiens	PRJEB10915
F. prausnitzii MGYG-HGUT-00039	Scaffold	2.85253	57.7	49	2638	unknown	PRJEB33885
F. prausnitzii 2789STDY5834970	Scaffold	3.0542	56	86	2796	Homo sapiens	PRJEB10915
F. prausnitzii BIOML-B1	Scaffold	3.20008	55.8	117	2938	Homo sapiens	PRJNA544527
F. prausnitzii P9224	Scaffold	2.7799	56.9	67	2574	unknown	PRJEB34180
F. prausnitzii BIOML-B15	Contig	3.30543	57.5	448	3127	Homo sapiens	PRJNA544527
F. prausnitzii SSTS_Bg7063	Contig	2.90429	57.8	275	2628	unknown	PRJEB26419
F. prausnitzii M21/2	Scaffold	3.12738	56.2	25	2855	Homo sapiens	PRJNA18203
F. prausnitzii A2-165	Scaffold	3.09035	56.3	20	2752	Homo sapiens	PRJEB39492
F. prausnitzii JCM 31915	Scaffold	3.10252	56.4	1	2837	Homo sapiens	PRJNA603249
F. prausnitzii 2789STDY5834930	Scaffold	3.92898	52.9	1135	3173	unknown	PRJEB10915
F. prausnitzii MGYG-HGUT-02274	Contig	2.74536	56.9	63	1991	unknown	PRJEB33885
F. prausnitzii BIOML-B16	Contig	3.4881	55.4	222	3264	Homo sapiens	PRJNA544527

## Sheet: Table2
Supplementary Table 2: Content of pan genes, accessory genes,and unique genes of 84 F. prausnitzii strains
Strains	Pan genes	Accessory genes	Unique genes
F. prausnitzii BIOML-A1	2632	2139	0
F. prausnitzii AF32-8AC	2686	2110	2
F. prausnitzii AM39-7BH	2616	2088	0
F. prausnitzii CNCM I 4541	2367	1875	1
F. prausnitzii AM37-13AC	2579	2055	3
F. prausnitzii BIOML-B4	2809	2258	0
F. prausnitzii 2789STDY5834930	1633	739	149
F. prausnitzii P9094	2682	2185	0
F. prausnitzii APC942/18-1	2527	2035	0
F. prausnitzii BIOML-B2	2831	2281	0
F. prausnitzii APC922/41-1	2540	2016	1
F. prausnitzii APC924/119	2723	2192	0
F. prausnitzii BIOML-B9	3050	2500	0
F. prausnitzii CNCM I 4575	2747	2218	0
F. prausnitzii BIOML-B13	3062	2512	0
F. prausnitzii AF36-11AT	2750	2210	0
F. prausnitzii BIOML-B18	2840	2272	0
F. prausnitzii CNCM I 4544	2536	2070	1
F. prausnitzii Indica	2543	2031	0
F. prausnitzii 2789STDY5608869	2633	2152	0
F. prausnitzii ATCC 27768	2769	2208	0
F. prausnitzii ATCC 27766	2740	2185	0
F. prausnitzii MGYG-HGUT-02274	1991	1538	1
F. prausnitzii BIOML-B12	2928	2388	0
F. prausnitzii BIOML-B15	2794	2266	4
F. prausnitzii CNCM I 4573	3004	2363	0
F. prausnitzii AF29-11BH	2997	2353	0
F. prausnitzii P9224	2544	2046	1
F. prausnitzii A2165	2784	2225	0
F. prausnitzii BIOML-B10	3058	2506	0
F. prausnitzii FPSSTS7063 SV a2 mod	2812	2260	0
F. prausnitzii AM33-14AC	2447	1982	0
F. prausnitzii JCM 31915	2822	2261	0
F. prausnitzii CNCM I 4546	2928	2261	2
F. prausnitzii APC923/61-1	2371	1918	2
F. prausnitzii L2/6	2946	2337	1
F. prausnitzii MGYG-HGUT-02272	2596	2126	0
F. prausnitzii BIOML-B1	2850	2280	5
F. prausnitzii BIOML-B14	3095	2545	0
F. prausnitzii A2-165	2724	2180	0
F. prausnitzii APC942/8-14-2	2406	1929	0
F. prausnitzii P9391	2586	2044	1
F. prausnitzii BIOML-B8	3174	2603	0
F. prausnitzii MGYG-HGUT-01300	2842	2288	0
F. prausnitzii BIOML-B3	2841	2280	0
F. prausnitzii AHMP21	2706	2174	1
F. prausnitzii P9123	2639	2139	2
F. prausnitzii P9241	2493	2008	0
F. prausnitzii CNCM I 4540	2746	2233	3
F. prausnitzii BIOML-B6	3110	2557	0
F. prausnitzii P9311	2902	2343	1
F. prausnitzii P9225	2581	2100	0
F. prausnitzii P9239	2329	1888	0
F. prausnitzii BIOML-B11	2904	2375	0
F. prausnitzii M21/2	2842	2288	0
F. prausnitzii CNCM I 4543	2897	2385	0
F. prausnitzii KLE1255	2647	2138	0
F. prausnitzii AM36-18BH	2627	2087	0
F. prausnitzii BIOML-B16	2971	2363	12
F. prausnitzii AHMP21_GCA.002550045	2604	2082	0
F. prausnitzii P9122	2879	2223	0
F. prausnitzii AF31-14AC	2963	2341	0
F. prausnitzii AM42-11AC	2750	2233	0
F. prausnitzii APC918/95b	2618	2094	0
F. prausnitzii SSTS Bg7063	2519	2038	0
F. prausnitzii JG BgPS064	2687	2145	1
F. prausnitzii MGYG-HGUT-00039	2633	2152	0
F. prausnitzii P9313	2408	1942	0
F. prausnitzii BIOML-B7	3172	2609	0
F. prausnitzii 942/30-2	2536	2039	0
F. prausnitzii aa_0143	2835	2281	0
F. prausnitzii AF10-13	2828	2216	1
F. prausnitzii P9240	2432	1958	0
F. prausnitzii APC923/51-1	2726	2182	2
F. prausnitzii CNCM I 4542	2705	2179	1
F. prausnitzii P9238	2677	2182	0
F. prausnitzii MGYG-HGUT-00195	3010	2411	6
F. prausnitzii 2789STDY5834970	2702	2164	0
F. prausnitzii APC942/32-1	2685	2164	3
F. prausnitzii SL3/3	2921	2372	0
F. prausnitzii BIOML-B17	2821	2259	0
F. prausnitzii CNCM I 4574	2902	2393	0
F. prausnitzii MGYG-HGUT-00022	2799	2250	0
F. prausnitzii MGYG-HGUT-02545	2536	2039	0

## Sheet: Table3
Supplementary Table 3: Distribution of COG categories in F. prausnitzii accessory, core, and unique genome
Code	Functional-Categories	All COG gene-number	Proportion of all COG gene-number	Core gene-number	Accessory gene-number	Specific gene-number
A	RNA processing and modification	0	0	0	0	0
B	Chromatin structure and dynamics	0	0	0	0	0
C	Energy production and conversion	159	0.037	12	142	5
D	Cell cycle control, cell division, chromosome partitioning	47	0.0109	1	44	2
E	Amino acid transport and metabolism	306	0.0712	15	288	3
F	Nucleotide transport and metabolism	91	0.0212	1	90	0
G	Carbohydrate transport and metabolism	406	0.0945	18	379	9
H	Coenzyme transport and metabolism	108	0.0251	9	97	2
I	Lipid transport and metabolism	86	0.02	5	81	0
J	Translation, ribosomal structure and biogenesis	172	0.04	5	166	1
K	Transcription	515	0.1199	22	486	7
L	Replication, recombination and repair	405	0.0943	17	374	14
M	Cell wall/membrane/envelope biogenesis	299	0.0696	32	258	9
N	Cell motility	13	0.003	0	13	0
O	Posttranslational modification, protein turnover, chaperones	98	0.0228	7	91	0
P	Inorganic ion transport and metabolism	170	0.0396	17	153	0
Q	Secondary metabolites biosynthesis, transport and catabolism	49	0.0114	1	46	2
R	General function prediction only	562	0.1308	39	515	8
S	Function unknown	321	0.0747	14	299	8
T	Signal transduction mechanisms	237	0.0552	18	217	2
U	Intracellular trafficking, secretion, and vesicular transport	51	0.0119	9	42	0
V	Defense mechanisms	200	0.0466	11	186	3
W	Extracellular structures	0	0	0	0	0
Y	Nuclear structure	0	0	0	0	0
Z	Cytoskeleton	0	0	0	0	0

## Sheet: Table4
Supplementary Table 4: The basic CAZyme annotation results of F. prausnitzii
Strains	Auxiliary activity (AA)	Carbohydrate-binding module (CBM)	Carbohydrate esterase (CE)	Glycoside hydrolase (GH)	Glycosyltransferase (GT)	Polysaccharide lyase (PL)	S-layer homology (SLH)
F. prausnitzii BIOML-A1	0	8	22	43	42	2	1
F. prausnitzii AF32-8AC	1	13	20	41	42	1	0
F. prausnitzii AM39-7BH	2	14	19	44	44	1	0
F. prausnitzii CNCM I 4541	0	8	19	37	49	2	0
F. prausnitzii AM37-13AC	3	10	21	40	40	2	0
F. prausnitzii BIOML-B4	3	9	28	40	44	3	1
F. prausnitzii 2789STDY5834930	0	6	8	20	41	1	0
F. prausnitzii P9094	1	9	22	42	34	1	0
F. prausnitzii APC942/18-1	2	14	22	39	31	1	0
F. prausnitzii BIOML-B2	3	9	29	43	41	3	1
F. prausnitzii APC922/41-1	0	10	22	35	44	2	0
F. prausnitzii APC924/119	3	9	22	40	46	2	1
F. prausnitzii BIOML-B9	3	10	28	43	45	3	0
F. prausnitzii CNCM I 4575	2	13	22	35	43	1	0
F. prausnitzii BIOML-B13	3	10	28	43	46	3	0
F. prausnitzii AF36-11AT	0	12	27	37	42	2	1
F. prausnitzii BIOML-B18	3	10	29	42	43	3	1
F. prausnitzii CNCM I 4544	1	9	21	36	48	3	0
F. prausnitzii Indica	3	11	19	42	37	1	0
F. prausnitzii 2789STDY5608869	1	10	21	40	44	3	1
F. prausnitzii ATCC 27768	3	12	22	43	43	2	0
F. prausnitzii ATCC 27766	3	12	22	42	45	2	0
F. prausnitzii MGYG-HGUT-02274	1	9	17	32	32	1	0
F. prausnitzii BIOML-B12	2	10	25	42	43	3	0
F. prausnitzii BIOML-B15	2	9	28	41	43	3	1
F. prausnitzii CNCM I 4573	4	11	23	40	47	2	0
F. prausnitzii AF29-11BH	2	10	21	45	52	2	0
F. prausnitzii P9224	0	11	20	42	37	3	0
F. prausnitzii A2165	1	10	21	45	36	1	0
F. prausnitzii BIOML-B10	3	10	28	43	45	3	0
F. prausnitzii FPSSTS7063 SV a2 mod	3	12	23	50	44	2	0
F. prausnitzii AM33-14AC	0	11	19	36	39	2	0
F. prausnitzii JCM 31915	1	10	22	45	36	1	0
F. prausnitzii CNCM I 4546	3	13	23	43	43	3	0
F. prausnitzii APC923/61-1	2	10	22	38	36	1	0
F. prausnitzii L2/6	3	11	22	52	47	2	0
F. prausnitzii MGYG-HGUT-02272	1	7	21	36	43	1	1
F. prausnitzii BIOML-B1	1	11	23	40	45	2	0
F. prausnitzii BIOML-B14	3	10	28	44	45	3	0
F. prausnitzii A2-165	1	10	20	42	36	1	0
F. prausnitzii APC942/8-14-2	0	9	20	38	34	1	0
F. prausnitzii P9391	0	10	23	43	42	2	0
F. prausnitzii BIOML-B8	3	10	29	44	46	3	0
F. prausnitzii MGYG-HGUT-01300	3	11	22	39	44	3	0
F. prausnitzii BIOML-B3	3	9	29	42	42	3	1
F. prausnitzii AHMP21	0	11	26	38	39	1	1
F. prausnitzii P9123	0	9	21	39	35	1	2
F. prausnitzii P9241	0	10	18	36	34	2	0
F. prausnitzii CNCM I 4540	1	10	23	36	47	1	1
F. prausnitzii BIOML-B6	3	12	27	44	46	2	0
F. prausnitzii P9311	2	10	24	42	36	2	1
F. prausnitzii P9225	2	10	21	38	35	3	0
F. prausnitzii P9239	1	10	17	36	33	3	0
F. prausnitzii BIOML-B11	2	10	25	42	42	3	0
F. prausnitzii M21/2	3	11	22	39	44	3	0
F. prausnitzii CNCM I 4543	2	11	17	43	43	1	1
F. prausnitzii KLE1255	2	10	20	43	45	1	0
F. prausnitzii AM36-18BH	1	14	18	35	39	2	0
F. prausnitzii BIOML-B16	3	10	29	41	49	3	1
F. prausnitzii AHMP21_GCA.002550045	0	9	17	39	35	1	0
F. prausnitzii P9122	2	12	23	44	44	2	2
F. prausnitzii AF31-14AC	1	10	24	44	53	3	0
F. prausnitzii AM42-11AC	2	11	22	42	44	1	1
F. prausnitzii APC918/95b	2	10	22	38	40	2	0
F. prausnitzii SSTS Bg7063	2	13	15	42	38	1	0
F. prausnitzii JG BgPS064	3	12	19	47	44	2	0
F. prausnitzii MGYG-HGUT-00039	1	10	21	40	44	3	1
F. prausnitzii P9313	0	10	19	35	34	1	0
F. prausnitzii BIOML-B7	3	10	28	44	45	3	0
F. prausnitzii 942/30-2	1	14	22	40	31	1	0
F. prausnitzii aa_0143	3	8	29	41	42	3	1
F. prausnitzii AF10-13	2	13	22	40	42	2	0
F. prausnitzii P9240	0	10	19	36	34	1	0
F. prausnitzii APC923/51-1	0	9	22	40	41	2	1
F. prausnitzii CNCM I 4542	1	9	24	40	42	3	0
F. prausnitzii P9238	1	9	22	42	34	1	0
F. prausnitzii MGYG-HGUT-00195	2	14	26	39	51	1	0
F. prausnitzii 2789STDY5834970	1	10	20	42	41	1	1
F. prausnitzii APC942/32-1	1	12	23	41	47	2	1
F. prausnitzii SL3/3	3	10	24	40	54	2	0
F. prausnitzii BIOML-B17	3	9	28	41	43	3	1
F. prausnitzii CNCM I 4574	2	11	17	43	43	1	1
F. prausnitzii MGYG-HGUT-00022	1	10	22	45	36	1	0
F. prausnitzii MGYG-HGUT-02545	1	14	22	40	31	1	0

## Sheet: Table5
Supplementary Table 5: The detail CAZyme annotation results of F. prausnitzii
Strains	AA3	AA6	CBM12	CBM13	CBM26	CBM31	CBM32	CBM34	CBM37	CBM5	CBM50	CBM51	CBM54	CBM62	CBM64	CBM66	CBM67	CE1	CE10	CE15	CE2	CE3	CE4	CE6	CE7	CE8	CE9	GH1	GH105	GH106	GH109	GH112	GH113	GH115	GH117	GH127	GH13	GH130	GH133	GH18	GH2	GH20	GH23	GH25	GH28	GH3	GH31	GH32	GH33
F. prausnitzii BIOML-A1	0	0	0	0	0	0	0	0	1	0	0	0	1	1	2	2	1	7	7	1	1	2	0	2	1	1	0	3	1	2	4	0	1	0	1	1	4	0	1	0	2	1	1	1	2	4	2	1	0
F. prausnitzii AF32-8AC	1	0	0	0	2	0	0	0	1	0	2	0	1	1	3	2	1	7	8	1	0	1	0	2	1	0	0	3	0	2	4	0	0	0	1	1	3	0	1	0	2	1	1	1	2	2	3	2	1
F. prausnitzii AM39-7BH	2	0	0	1	3	0	0	0	1	0	2	0	1	1	2	2	1	7	7	1	0	1	0	2	1	0	0	3	0	2	3	0	1	0	1	1	3	2	1	0	2	1	2	1	3	3	2	2	0
F. prausnitzii CNCM I 4541	0	0	0	0	0	0	0	0	1	0	1	0	1	1	1	2	1	6	8	1	0	1	0	2	1	0	0	2	0	2	4	0	0	0	1	1	2	0	1	0	1	1	2	1	2	3	1	1	0
F. prausnitzii AM37-13AC	3	0	0	0	1	0	1	0	1	0	2	0	1	1	0	2	1	8	7	1	1	1	0	2	1	0	0	3	1	2	3	0	0	0	1	1	4	0	1	0	2	1	1	1	1	4	2	2	0
F. prausnitzii BIOML-B4	2	1	0	0	0	0	1	0	1	0	2	0	1	1	0	2	1	9	9	1	1	3	0	2	2	1	0	2	0	2	6	0	0	0	1	1	3	0	1	0	3	1	1	2	1	3	2	1	0
F. prausnitzii 2789STDY5834930	0	0	0	0	0	0	0	1	1	1	0	0	0	1	0	2	0	1	1	1	0	1	2	2	0	0	0	1	0	1	2	0	0	0	1	1	0	0	1	0	1	1	0	0	1	3	0	0	0
F. prausnitzii P9094	0	1	0	0	0	0	0	0	1	0	1	0	1	1	2	2	1	9	6	1	0	2	0	2	2	0	0	3	2	2	4	0	1	0	1	1	3	0	1	0	3	1	1	1	2	2	2	1	0
F. prausnitzii APC942/18-1	1	1	1	0	1	0	0	0	1	0	3	0	1	1	3	2	1	9	7	2	0	1	0	2	1	0	0	2	1	2	3	0	0	0	1	1	4	0	1	0	2	1	1	1	2	3	3	1	0
F. prausnitzii BIOML-B2	2	1	0	0	0	0	1	0	1	0	2	0	1	1	0	2	1	10	9	1	1	3	0	2	2	1	0	3	0	2	6	0	0	0	1	1	3	0	1	0	3	1	1	2	1	3	2	2	0
F. prausnitzii APC922/41-1	0	0	0	0	1	0	0	0	1	0	1	0	1	1	2	2	1	6	10	2	0	1	0	2	1	0	0	3	0	2	3	0	0	0	1	1	2	0	1	0	1	1	1	1	2	2	2	1	0
F. prausnitzii APC924/119	2	1	0	0	1	0	1	0	1	0	1	0	1	1	0	2	1	6	8	1	1	2	0	2	2	0	0	3	0	2	4	0	0	1	1	1	4	0	1	0	3	1	1	1	1	4	2	1	0
F. prausnitzii BIOML-B9	2	1	0	1	1	0	1	0	1	0	1	0	1	1	0	2	1	9	9	1	2	2	0	2	2	0	1	4	0	2	3	1	0	0	1	1	4	0	1	0	4	1	1	1	2	5	2	0	0
F. prausnitzii CNCM I 4575	1	1	0	1	0	0	0	0	1	0	4	0	1	1	2	2	1	5	9	1	0	1	1	2	1	1	1	3	0	2	3	0	0	0	1	1	2	0	1	0	1	1	1	1	2	2	2	1	0
F. prausnitzii BIOML-B13	2	1	0	1	1	0	1	0	1	0	1	0	1	1	0	2	1	8	10	1	2	2	0	2	2	0	1	4	0	2	3	1	0	0	1	1	4	0	1	0	4	1	1	1	2	5	2	0	0
F. prausnitzii AF36-11AT	0	0	0	0	1	0	0	1	1	0	2	0	1	1	2	2	1	13	6	1	0	2	0	2	2	1	0	2	0	2	4	0	0	0	1	1	2	0	1	0	2	1	2	2	1	2	2	1	0
F. prausnitzii BIOML-B18	2	1	0	0	0	0	1	0	1	0	3	0	1	1	0	2	1	10	9	1	1	3	0	2	2	1	0	2	0	2	6	0	0	0	1	1	3	0	1	0	3	1	1	2	1	3	2	2	0
F. prausnitzii CNCM I 4544	0	1	0	0	1	0	0	1	1	0	1	0	1	1	0	2	1	7	7	2	0	1	0	2	1	1	0	1	0	2	3	0	0	0	1	1	2	2	1	0	1	1	2	1	2	2	2	1	1
F. prausnitzii Indica	2	1	0	1	1	0	0	0	1	0	1	0	1	1	2	2	1	7	7	1	0	1	0	2	1	0	0	2	0	2	3	0	1	0	1	1	2	4	1	0	4	1	1	1	2	3	1	1	0
F. prausnitzii 2789STDY5608869	0	1	0	0	1	0	0	0	1	0	1	0	1	1	2	2	1	6	7	1	0	2	2	2	1	0	0	4	0	2	7	0	0	0	1	1	2	0	1	0	1	1	1	1	2	2	2	1	0
F. prausnitzii ATCC 27768	2	1	0	1	1	0	1	0	1	0	3	0	1	1	0	2	1	7	8	1	1	1	0	2	1	1	0	5	0	2	3	0	1	0	1	1	4	0	1	0	3	1	1	1	1	4	3	1	0
F. prausnitzii ATCC 27766	2	1	0	1	1	0	1	0	1	0	3	0	1	1	0	2	1	7	8	1	1	1	0	2	1	1	0	5	0	2	3	0	1	0	1	1	4	0	1	0	3	1	1	1	1	3	3	1	0
F. prausnitzii MGYG-HGUT-02274	0	1	0	0	0	0	0	0	1	0	2	0	0	1	2	2	1	6	7	0	0	1	0	2	1	0	0	2	0	2	3	0	0	0	1	1	1	0	0	0	2	1	1	1	2	3	2	1	1
F. prausnitzii BIOML-B12	2	0	0	1	1	0	1	0	1	0	1	0	1	1	0	2	1	8	9	1	1	2	0	2	2	0	0	4	0	2	3	1	0	0	1	1	4	0	1	0	4	1	1	1	2	4	2	0	0
F. prausnitzii BIOML-B15	1	1	0	0	0	0	1	0	1	0	2	0	1	1	0	2	1	9	9	1	1	3	0	2	2	1	0	1	0	2	6	0	0	0	1	1	3	0	1	0	3	1	1	2	1	4	2	1	0
F. prausnitzii CNCM I 4573	2	2	0	0	1	0	1	1	1	0	2	0	1	1	0	2	1	7	8	1	1	1	0	2	1	1	1	4	0	2	3	0	0	0	1	1	3	0	1	0	3	1	1	1	2	3	2	1	0
F. prausnitzii AF29-11BH	2	0	0	0	0	0	1	0	1	0	3	0	1	1	0	2	1	6	9	1	1	1	0	2	1	0	0	7	0	2	5	0	0	0	1	1	3	0	1	0	4	1	1	1	1	4	2	1	0
F. prausnitzii P9224	0	0	0	0	1	0	1	0	1	0	1	0	1	1	2	2	1	6	7	1	0	2	1	2	1	0	0	5	0	2	3	0	1	0	1	1	2	2	1	0	2	1	1	1	2	4	2	0	0
F. prausnitzii A2165	0	1	0	0	0	0	0	0	1	0	1	1	1	1	2	2	1	9	5	1	0	2	1	2	1	0	0	4	2	2	3	0	0	0	1	1	3	0	1	0	3	1	1	1	3	3	2	2	0
F. prausnitzii BIOML-B10	2	1	0	1	1	0	1	0	1	0	1	0	1	1	0	2	1	9	9	1	2	2	0	2	2	0	1	4	0	2	3	1	0	0	1	1	4	0	1	0	4	1	1	1	2	5	2	0	0
F. prausnitzii FPSSTS7063 SV a2 mod	1	2	0	0	1	0	0	1	1	0	2	0	1	1	2	2	1	8	9	1	1	1	0	1	1	0	1	6	0	2	4	0	0	0	1	1	3	3	1	0	4	1	1	1	1	2	3	0	1
F. prausnitzii AM33-14AC	0	0	0	1	0	0	0	0	1	0	2	0	1	1	2	2	1	6	7	1	0	1	0	2	1	1	0	1	0	2	3	0	0	0	1	1	2	1	1	0	2	1	1	1	1	2	2	1	1
F. prausnitzii JCM 31915	0	1	0	0	0	0	0	0	1	0	1	1	1	1	2	2	1	9	6	1	0	2	1	2	1	0	0	4	2	2	3	0	0	0	1	1	3	0	1	0	3	1	1	1	3	3	2	2	0
F. prausnitzii CNCM I 4546	2	1	0	1	1	0	1	0	1	0	4	0	1	1	0	2	1	7	9	1	1	1	1	2	1	0	0	4	0	3	4	0	0	0	1	1	4	0	1	0	3	1	2	1	1	3	3	0	0
F. prausnitzii APC923/61-1	1	1	0	0	0	0	0	0	1	0	2	0	1	1	2	2	1	7	8	1	0	2	0	2	2	0	0	1	0	2	4	0	1	0	1	1	3	0	1	0	3	1	1	1	2	3	2	0	1
F. prausnitzii L2/6	0	3	0	0	1	0	0	0	1	0	1	0	1	1	3	2	1	6	8	1	1	2	0	1	2	1	0	5	0	2	4	0	0	1	1	1	3	2	1	0	4	1	1	1	1	2	2	1	1
F. prausnitzii MGYG-HGUT-02272	1	0	0	0	0	0	0	1	1	0	0	0	1	1	0	2	1	8	8	1	0	1	0	2	1	0	0	0	0	2	5	0	0	0	1	1	2	0	1	0	3	1	2	1	1	2	2	1	0
F. prausnitzii BIOML-B1	1	0	0	0	0	0	1	0	1	0	4	0	1	1	0	2	1	7	8	1	1	1	1	2	1	1	0	2	0	2	3	0	0	0	1	1	4	1	1	0	5	1	1	1	2	3	3	0	0
F. prausnitzii BIOML-B14	2	1	0	1	1	0	1	0	1	0	1	0	1	1	0	2	1	8	10	1	2	2	0	2	2	0	1	4	0	2	3	1	0	0	1	1	4	0	1	0	4	1	1	1	2	6	2	0	0
F. prausnitzii A2-165	0	1	0	0	0	0	0	0	1	0	1	1	1	1	2	2	1	9	6	1	0	1	1	1	1	0	0	4	2	2	3	0	0	0	1	1	3	0	1	0	3	1	1	1	3	2	1	2	0
F. prausnitzii APC942/8-14-2	0	0	0	0	0	0	0	0	1	0	1	0	1	1	2	2	1	7	8	1	0	1	0	2	1	0	0	1	0	2	3	0	0	0	1	1	3	0	1	1	4	1	1	1	1	4	2	1	1
F. prausnitzii P9391	0	0	0	1	0	0	0	0	1	0	1	0	1	1	2	2	1	8	9	1	0	1	1	2	1	0	0	1	0	2	4	0	1	0	1	1	5	1	1	0	3	1	1	1	2	4	3	2	0
F. prausnitzii BIOML-B8	2	1	0	1	1	0	1	0	1	0	1	0	1	1	0	2	1	10	9	1	2	2	0	2	2	0	1	4	0	2	4	1	0	0	1	1	4	0	1	0	4	1	1	1	2	5	2	0	0
F. prausnitzii MGYG-HGUT-01300	2	1	0	0	1	0	1	0	1	0	3	0	1	1	0	2	1	6	10	1	1	1	0	2	1	0	0	3	0	2	3	0	0	0	1	1	3	0	1	0	3	1	0	1	3	3	2	2	0
F. prausnitzii BIOML-B3	2	1	0	0	0	0	1	0	1	0	2	0	1	1	0	2	1	10	9	1	1	3	0	2	2	1	0	3	0	2	6	0	0	0	1	1	3	0	1	0	3	1	1	2	1	3	2	2	0
F. prausnitzii AHMP21	0	0	0	0	1	0	0	0	1	0	2	0	1	1	2	2	1	9	9	1	0	1	1	2	2	1	0	2	0	2	4	0	0	0	1	1	4	0	1	0	2	1	1	1	1	4	2	1	0
F. prausnitzii P9123	0	0	0	0	0	0	0	0	1	0	1	0	1	1	2	2	1	7	7	1	0	1	0	2	3	0	0	3	0	2	4	0	1	0	1	1	2	0	1	0	2	1	1	1	1	4	2	0	1
F. prausnitzii P9241	0	0	0	0	1	1	0	0	1	0	0	0	1	1	2	2	1	6	6	1	0	2	0	2	1	0	0	2	1	2	3	0	0	0	1	1	3	0	1	0	3	1	1	1	1	3	2	0	0
F. prausnitzii CNCM I 4540	1	0	0	0	2	0	0	1	1	0	1	0	1	1	0	2	1	8	8	1	1	2	0	2	1	0	0	1	0	2	3	0	0	0	1	1	2	1	1	0	1	1	2	4	1	2	2	1	0
F. prausnitzii BIOML-B6	2	1	0	1	1	0	1	0	1	0	3	0	1	1	0	2	1	8	9	1	2	2	0	2	2	0	1	4	0	2	3	2	0	0	1	1	4	0	1	0	4	1	1	1	2	5	2	0	0
F. prausnitzii P9311	0	2	0	0	0	0	0	1	1	0	1	0	1	1	2	2	1	9	7	1	1	2	0	2	1	0	1	1	0	2	6	0	1	1	1	1	2	0	1	0	2	1	1	2	1	3	2	1	1
F. prausnitzii P9225	1	1	0	0	0	0	1	0	1	0	1	0	1	1	2	2	1	7	7	1	0	1	0	2	2	0	1	2	0	2	3	0	0	0	1	1	4	0	1	0	2	1	1	1	2	2	3	1	1
F. prausnitzii P9239	1	0	0	0	0	0	1	0	1	0	1	0	1	1	2	2	1	6	6	1	0	1	0	2	1	0	0	3	0	2	3	0	0	0	1	1	2	0	1	0	3	1	1	1	2	3	2	0	1
F. prausnitzii BIOML-B11	2	0	0	1	1	0	1	0	1	0	1	0	1	1	0	2	1	8	9	1	1	2	0	2	2	0	0	4	0	2	3	1	0	0	1	1	4	0	1	0	4	1	1	1	2	4	2	0	0
F. prausnitzii M21/2	2	1	0	0	1	0	1	0	1	0	3	0	1	1	0	2	1	6	10	1	1	1	0	2	1	0	0	3	0	2	3	0	0	0	1	1	3	0	1	0	3	1	0	1	3	3	2	2	0
F. prausnitzii CNCM I 4543	0	2	0	0	0	0	0	0	1	0	3	0	1	1	2	2	1	6	5	1	0	1	1	2	1	0	0	3	0	2	5	0	0	1	1	1	2	2	1	0	4	1	1	1	1	3	2	1	0
F. prausnitzii KLE1255	1	1	0	1	0	0	0	1	1	0	2	0	1	1	0	2	1	7	6	1	0	2	0	2	2	0	0	3	0	2	4	0	0	0	1	1	2	4	1	0	1	1	2	1	1	2	2	1	0
F. prausnitzii AM36-18BH	1	0	0	0	2	0	1	0	1	0	5	0	1	1	0	2	1	6	7	1	0	1	0	2	1	0	0	2	0	2	3	0	0	0	1	1	3	0	1	0	2	1	1	1	1	3	2	1	0
F. prausnitzii BIOML-B16	2	1	0	0	0	0	1	0	1	1	2	0	1	1	0	2	1	9	9	1	2	3	0	2	2	1	0	1	0	2	7	0	0	0	1	1	3	0	1	0	3	1	1	2	1	3	2	1	0
F. prausnitzii AHMP21_GCA.002550045	0	0	0	0	0	0	0	0	1	0	1	0	1	1	2	2	1	7	5	1	0	1	0	2	1	0	0	2	0	2	3	0	0	0	1	1	2	2	1	0	2	1	1	1	2	2	2	1	1
F. prausnitzii P9122	2	0	0	0	0	0	0	1	1	0	3	0	1	1	2	2	1	9	7	1	0	2	0	2	2	0	0	5	0	2	3	0	2	0	1	1	3	0	1	0	2	1	1	1	1	4	2	1	0
F. prausnitzii AF31-14AC	1	0	0	0	1	0	1	0	1	0	2	0	1	1	0	2	1	9	8	1	1	1	0	2	1	1	0	3	0	2	3	0	1	0	1	1	3	0	1	0	3	1	2	1	2	3	2	4	0
F. prausnitzii AM42-11AC	2	0	0	0	2	0	0	0	1	0	1	0	1	1	2	2	1	9	7	1	0	2	0	2	1	0	0	3	0	2	5	0	1	0	1	1	3	0	1	0	2	1	1	2	3	3	1	1	0
F. prausnitzii APC918/95b	2	0	0	0	0	0	1	0	1	0	3	0	1	1	0	2	1	7	8	1	1	1	0	2	2	0	0	2	0	2	3	0	0	0	1	1	3	0	1	0	4	1	1	1	2	4	2	1	0
F. prausnitzii SSTS Bg7063	0	2	0	0	1	0	0	1	1	0	2	0	1	1	3	2	1	4	7	1	0	1	0	1	1	0	0	3	0	2	3	0	0	0	1	1	3	2	1	0	2	1	1	1	1	2	3	0	1
F. prausnitzii JG BgPS064	1	2	0	0	1	0	0	2	1	0	0	0	1	1	3	2	1	6	6	1	1	1	0	1	2	1	0	5	0	2	3	0	0	0	1	1	4	1	1	1	4	1	1	1	0	2	3	0	1
F. prausnitzii MGYG-HGUT-00039	0	1	0	0	1	0	0	0	1	0	1	0	1	1	2	2	1	6	7	1	0	2	2	2	1	0	0	4	0	2	7	0	0	0	1	1	2	0	1	0	1	1	1	1	2	2	2	1	0
F. prausnitzii P9313	0	0	0	0	1	1	0	0	1	0	0	0	1	1	2	2	1	6	7	1	0	2	0	2	1	0	0	2	1	2	3	0	0	0	1	1	3	0	1	0	2	1	1	1	1	3	2	0	0
F. prausnitzii BIOML-B7	2	1	0	1	1	0	1	0	1	0	1	0	1	1	0	2	1	9	9	1	2	2	0	2	2	0	1	4	0	2	4	1	0	0	1	1	4	0	1	0	4	1	1	1	2	5	2	0	0
F. prausnitzii 942/30-2	0	1	1	0	1	0	0	0	1	0	3	0	1	1	3	2	1	9	7	2	0	1	0	2	1	0	0	2	1	2	3	0	0	0	1	1	4	0	1	0	2	1	1	1	2	3	3	1	0
F. prausnitzii aa_0143	2	1	0	0	0	0	1	0	1	0	1	0	1	1	0	2	1	10	9	1	1	3	0	2	2	1	0	2	0	2	6	0	0	0	1	1	3	0	1	0	3	1	1	2	1	3	2	2	0
F. prausnitzii AF10-13	2	0	0	0	2	0	1	0	1	0	4	0	1	1	0	2	1	8	8	1	1	1	0	2	1	0	0	3	0	2	4	0	0	0	1	1	4	0	1	0	2	1	1	1	1	3	3	2	0
F. prausnitzii P9240	0	0	0	0	1	1	0	0	1	0	0	0	1	1	2	2	1	6	7	1	0	2	0	2	1	0	0	2	1	2	3	0	0	0	1	1	3	0	1	0	3	1	1	1	1	3	2	0	0
F. prausnitzii APC923/51-1	0	0	0	0	1	0	0	1	1	0	1	0	1	1	0	2	1	7	8	1	1	1	1	2	1	0	0	3	0	2	5	0	1	0	1	1	3	0	1	0	2	1	1	1	2	3	2	1	0
F. prausnitzii CNCM I 4542	0	1	0	1	0	0	0	1	1	0	1	0	1	1	0	2	1	9	7	2	0	2	0	2	2	0	0	2	0	2	3	0	0	0	1	1	3	2	1	0	1	1	2	1	2	2	3	1	1
F. prausnitzii P9238	0	1	0	0	0	0	0	0	1	0	1	0	1	1	2	2	1	9	6	1	0	2	0	2	2	0	0	3	2	2	4	0	1	0	1	1	3	0	1	0	3	1	1	1	2	2	2	1	0
F. prausnitzii MGYG-HGUT-00195	1	1	0	0	2	0	0	0	1	0	4	0	1	1	2	2	1	8	10	1	1	1	2	2	1	0	0	3	0	2	3	0	0	0	1	1	3	0	1	0	2	1	1	1	2	3	2	2	0
F. prausnitzii 2789STDY5834970	1	0	0	0	0	0	0	0	1	0	4	0	1	1	0	2	1	6	8	1	0	1	1	2	1	0	0	6	0	2	3	0	0	0	1	1	5	0	1	0	3	1	1	1	1	3	3	0	0
F. prausnitzii APC942/32-1	0	1	0	0	1	0	0	0	1	0	2	0	1	1	3	2	1	7	7	1	0	3	1	1	2	1	0	3	0	2	5	0	0	0	1	1	2	0	1	0	1	1	1	1	1	2	3	1	1
F. prausnitzii SL3/3	2	1	0	0	2	0	1	0	1	0	1	0	1	1	0	2	1	8	10	1	1	1	0	2	1	0	0	3	0	2	3	0	0	0	1	1	3	0	1	0	3	1	1	1	1	4	3	3	0
F. prausnitzii BIOML-B17	2	1	0	0	0	0	1	0	1	0	2	0	1	1	0	2	1	9	9	1	1	3	0	2	2	1	0	2	0	2	6	0	0	0	1	1	3	0	1	0	3	1	1	2	1	3	2	1	0
F. prausnitzii CNCM I 4574	0	2	0	0	0	0	0	0	1	0	3	0	1	1	2	2	1	6	5	1	0	1	1	2	1	0	0	3	0	2	5	0	0	1	1	1	2	2	1	0	4	1	1	1	1	3	2	1	0
F. prausnitzii MGYG-HGUT-00022	0	1	0	0	0	0	0	0	1	0	1	1	1	1	2	2	1	9	6	1	0	2	1	2	1	0	0	4	2	2	3	0	0	0	1	1	3	0	1	0	3	1	1	1	3	3	2	2	0
F. prausnitzii MGYG-HGUT-02545	0	1	1	0	1	0	0	0	1	0	3	0	1	1	3	2	1	9	7	2	0	1	0	2	1	0	0	2	1	2	3	0	0	0	1	1	4	0	1	0	2	1	1	1	2	3	3	1	0
[truncated: 34 more columns]

## Sheet: Table6
Supplementary Table 6: KEGG annotational results of the proteins of 84 F. prausnitzii strains
Type	Count
Metabolism	1815
Genetic Information Processing	181
Environmental Information Processing	172
Cellular Processes	92
Organismal Systems	31
Human Diseases	67

## Sheet: Table7
Supplementary Table 7: Detailed annotational results of the proteins of 84 F. prausnitzii strains against KEGG database by GhostKOALA and KofamKOALA
Type	Function	Function details	Count
Metabolism	Global and overview maps	Metabolic pathways	436
		Biosynthesis of secondary metabolites	186
		Microbial metabolism in diverse environments	96
		Carbon metabolism	51
		2-Oxocarboxylic acid metabolism	17
		Fatty acid metabolism	12
		Biosynthesis of amino acids	93
		Biosynthesis of cofactors	87
		Degradation of aromatic compounds	2
	Carbohydrate metabolism	Glycolysis / Gluconeogenesis	21
		Citrate cycle (TCA cycle)	8
		Pentose phosphate pathway	16
		Pentose and glucuronate interconversions	18
		Fructose and mannose metabolism	21
		Galactose metabolism	15
		Ascorbate and aldarate metabolism	5
		Starch and sucrose metabolism	29
		Amino sugar and nucleotide sugar metabolism	36
		Pyruvate metabolism	20
		Glyoxylate and dicarboxylate metabolism	16
		Propanoate metabolism	17
		Butanoate metabolism	15
		C5-Branched dibasic acid metabolism	5
		Inositol phosphate metabolism	4
	Energy metabolism	Oxidative phosphorylation	14
		Photosynthesis	8
		Carbon fixation in photosynthetic organisms	11
		Carbon fixation pathways in prokaryotes	18
		Methane metabolism	14
		Nitrogen metabolism	7
		Sulfur metabolism	6
	Lipid metabolism	Fatty acid biosynthesis	8
		Fatty acid degradation	4
		Synthesis and degradation of ketone bodies	2
		Glycerolipid metabolism	9
		Glycerophospholipid metabolism	12
		Ether lipid metabolism	1
		Sphingolipid metabolism	2
		Arachidonic acid metabolism	1
		Linoleic acid metabolism	1
		alpha-Linolenic acid metabolism	1
	Nucleotide metabolism	Purine metabolism	36
		Pyrimidine metabolism	31
	Amino acid metabolism	Alanine, aspartate and glutamate metabolism	18
		Glycine, serine and threonine metabolism	18
		Cysteine and methionine metabolism	23
		Valine, leucine and isoleucine degradation	11
		Lysine biosynthesis	14
		Lysine degradation	4
		Arginine biosynthesis	10
		Arginine and proline metabolism	10
		Histidine metabolism	8
		Tyrosine metabolism	3
		Phenylalanine metabolism	6
		Tryptophan metabolism	2
		Phenylalanine, tyrosine and tryptophan biosynthesis	19
	Metabolism of other amino acids	beta-Alanine metabolism	2
		Taurine and hypotaurine metabolism	3
		Selenocompound metabolism	9
		Cyanoamino acid metabolism	4
		D-Glutamine and D-glutamate metabolism	3
		D-Alanine metabolism	2
		Glutathione metabolism	3
	Glycan biosynthesis and metabolism	N-Glycan biosynthesis	1
		Various types of N-glycan biosynthesis	2
		Glycosaminoglycan degradation	3
		Glycosphingolipid biosynthesis - globo and isoglobo series	2
		Glycosphingolipid biosynthesis - ganglio series	1
		Lipopolysaccharide biosynthesis	5
		O-Antigen repeat unit biosynthesis	1
		O-Antigen nucleotide sugar biosynthesis	21
		Peptidoglycan biosynthesis	16
		Other glycan degradation	2
		Arabinogalactan biosynthesis - Mycobacterium	3
	Metabolism of cofactors and vitamins	Thiamine metabolism	13
		Riboflavin metabolism	7
		Vitamin B6 metabolism	4
		Nicotinate and nicotinamide metabolism	13
		Pantothenate and CoA biosynthesis	11
		Biotin metabolism	4
		Folate biosynthesis	13
		One carbon pool by folate	11
		Porphyrin and chlorophyll metabolism	23
		Ubiquinone and other terpenoid-quinone biosynthesis	2
	Metabolism of terpenoids and polyketides	Terpenoid backbone biosynthesis	10
		Zeatin biosynthesis	1
		Limonene and pinene degradation	1
		Geraniol degradation	2
		Biosynthesis of ansamycins	1
		Polyketide sugar unit biosynthesis	5
		Biosynthesis of vancomycin group antibiotics	1
	Biosynthesis of other secondary metabolites	Phenylpropanoid biosynthesis	2
		Flavone and flavonol biosynthesis	1
		Isoquinoline alkaloid biosynthesis	1
		Tropane, piperidine and pyridine alkaloid biosynthesis	2
		Glucosinolate biosynthesis	2
		Penicillin and cephalosporin biosynthesis	2
		Carbapenem biosynthesis	2
		Monobactam biosynthesis	4
		Streptomycin biosynthesis	5
		Neomycin, kanamycin and gentamicin biosynthesis	1
		Acarbose and validamycin biosynthesis	2
		Novobiocin biosynthesis	3
		Phenazine biosynthesis	2
		Prodigiosin biosynthesis	2
		Biosynthesis of various secondary metabolites - part 2	1
	Xenobiotics biodegradation and metabolism	Benzoate degradation	7
		Aminobenzoate degradation	3
		Caprolactam degradation	1
		Metabolism of xenobiotics by cytochrome P450	1
		Drug metabolism - other enzymes	8
Genetic Information Processing	Transcription	RNA polymerase	3
		Basal transcription factors	1
	Translation	Ribosome	53
		Aminoacyl-tRNA biosynthesis	22
		Ribosome biogenesis in eukaryotes	1
	Folding, sorting and degradation	Protein export	13
		Protein processing in endoplasmic reticulum	2
		Sulfur relay system	7
		RNA degradation	11
	Replication and repair	DNA replication	13
		Base excision repair	11
		Nucleotide excision repair	8
		Mismatch repair	17
		Homologous recombination	19
Environmental Information Processing	Membrane transport	ABC transporters	82
		Phosphotransferase system	17
		Bacterial secretion system	13
	Signal transduction	Two-component system	50
		MAPK signaling pathway - fly	1
		MAPK signaling pathway - plant	1
		HIF-1 signaling pathway	4
		FoxO signaling pathway	1
		Phosphatidylinositol signaling system	1
		PI3K-Akt signaling pathway	1
		AMPK signaling pathway	1
Cellular Processes	Transport and catabolism	Lysosome	2
		Peroxisome	3
		Autophagy - yeast	1
	Cell growth and death	Cell cycle - Caulobacter	11
		Ferroptosis	1
		Necroptosis	3
	Cellular community - prokaryotes	Quorum sensing	45
		Biofilm formation - Vibrio cholerae	7
		Biofilm formation - Pseudomonas aeruginosa	8
		Biofilm formation - Escherichia coli	5
	Cell motility	Bacterial chemotaxis	2
		Flagellar assembly	4
Organismal Systems	Immune system	NOD-like receptor signaling pathway	3
		Antigen processing and presentation	1
		Th17 cell differentiation	1
		IL-17 signaling pathway	1
	Endocrine system	Insulin signaling pathway	1
		Glucagon signaling pathway	3
		PPAR signaling pathway	2
		Estrogen signaling pathway	1
		Progesterone-mediated oocyte maturation	1
		Thyroid hormone signaling pathway	1
	Digestive system	Fat digestion and absorption	1
		Mineral absorption	2
	Nervous system	Glutamatergic synapse	1
		GABAergic synapse	1
	Aging	Longevity regulating pathway	1
		Longevity regulating pathway - worm	4
		ongevity regulating pathway - multiple species	2
	Environmental adaptation	Plant-pathogen interaction	4
Human Diseases	Cancer: overview	Pathways in cancer	1
		MicroRNAs in cancer	1
		Proteoglycans in cancer	1
		Chemical carcinogenesis - receptor activation	1
		Chemical carcinogenesis - reactive oxygen species	1
		Viral carcinogenesis	1
		Central carbon metabolism in cancer	3
	Cancer: specific types	Prostate cancer	1
	Infectious disease: viral	Human papillomavirus infection	1
	Infectious disease: bacterial	Epithelial cell signaling in Helicobacter pylori infection	1
		Pathogenic Escherichia coli infection	1
		Salmonella infection	3
		Pertussis	1
		Legionellosis	2
		Tuberculosis	4
	Neurodegenerative disease	Alzheimer disease	1
		Parkinson disease	1
		Huntington disease	1
	Cardiovascular disease	Lipid and atherosclerosis	3
		Fluid shear stress and atherosclerosis	3
		Diabetic cardiomyopathy	2
	Endocrine and metabolic disease	Type II diabetes mellitus	1
		Type I diabetes mellitus	1
		Insulin resistance	2
	Drug resistance: antimicrobial	beta-Lactam resistance	13
		Vancomycin resistance	7
		Cationic antimicrobial peptide (CAMP) resistance	5
	Drug resistance: antineoplastic	Platinum drug resistance	1
		Antifolate resistance	3

## Sheet: Table8
Supplementary Table 8: Secondary metabolic gene clusters (refer to biosynthesis gene clusters, BGCs) of 84 F. prausnitzii strains
Strains	Cluster	Region	Cluster Types	Description	Location	Total
F. prausnitzii M21/2	NZ_DS483503.1	1.1	ranthipeptide	Cys-rich peptides	438,197 - 459,862 nt	21,666 nt
	NZ_DS483501.1	3.1	cyclic-lactone-autoinducer	agrD-like cyclic lactone autoinducer peptides	127,440 - 148,027 nt	20,588 nt
F. prausnitzii A2-165	NZ_GG697156.2	6.1	cyclic-lactone-autoinducer	agrD-like cyclic lactone autoinducer peptides	95,451 - 116,071 nt	20,621 nt
	NZ_GG697153.2	9.1	cyclic-lactone-autoinducer	agrD-like cyclic lactone autoinducer peptides	15,848 - 37,327 nt	21,480 nt
	NZ_GG697151.2	11.1	ranthipeptide	Cys-rich peptides	157,915 - 179,581 nt	21,667 nt
F. prausnitzii KLE1255	NZ_GL538315.1	84.1	ranthipeptide	Cys-rich peptides	257,750 - 279,289 nt	21,540 nt
	NZ_GL538336.1	95.1	cyclic-lactone-autoinducer	agrD-like cyclic lactone autoinducer peptides	69,033 - 85,510 nt	16,478 nt
F. prausnitzii SL3/3	NC_021020.1	1.1	cyclic-lactone-autoinducer	agrD-like cyclic lactone autoinducer peptides	849,584 - 869,582 nt	19,999 nt
		1.2	cyclic-lactone-autoinducer	agrD-like cyclic lactone autoinducer peptides	1,897,841 - 1,918,407 nt	20,567 nt
		1.3	ranthipeptide	Cys-rich peptides	2,849,702 - 2,871,376 nt	21,675 nt
F. prausnitzii L2/6	NC_021042.1	1.1	ranthipeptide	Cys-rich peptides	396,878 - 418,545 nt	21,668 nt
		1.2	cyclic-lactone-autoinducer	agrD-like cyclic lactone autoinducer peptides	2,157,256 - 2,179,382 nt	22,127 nt
		1.3	RiPP-like	Other unspecified ribosomally synthesised and post-translationally modified peptide product (RiPP) cluster	2,788,487 - 2,800,826 nt	12,340 nt
F. prausnitzii 2789STDY5834970	NZ_CYXN01000001	1.1	ranthipeptide	Cys-rich peptides	332,263 - 353,928 nt	21,666 nt
	NZ_CYXN01000009	9.1	cyclic-lactone-autoinducer	agrD-like cyclic lactone autoinducer peptides	46 - 31,941 nt	31,896 nt
	NZ_CYXN01000046	46.1	cyclic-lactone-autoinducer	agrD-like cyclic lactone autoinducer peptides	769 - 11,510 nt	10,742 nt
F. prausnitzii 2789STDY5608869	NZ_CYYL01000001	1.1	ranthipeptide	Cys-rich peptides	124,530 - 146,196 nt	21,667 nt
	NZ_CYYL01000008	8.1	cyclic-lactone-autoinducer	agrD-like cyclic lactone autoinducer peptides	90,837 - 112,317 nt	21,481 nt
F. prausnitzii 2789STDY5834930	NZ_CZBH02000001	42.1	lantipeptide class I	Class I lanthipeptide clusters like nisin	1,113,606 - 1,136,367 nt	22,762 nt
F. prausnitzii CNCM I 4540	NZ_NMTQ01000016	2.1	cyclic-lactone-autoinducer	agrD-like cyclic lactone autoinducer peptides	1 - 13,961 nt	13,961 nt
	NZ_NMTQ01000036	45.1	ranthipeptide	Cys-rich peptides	138,758 - 157,399 nt	18,642 nt
F. prausnitzii CNCM I 4541	NZ_NMTR01000021	11.1	ranthipeptide	Cys-rich peptides	732,067 - 753,732 nt	21,666 nt
	NZ_NMTR01000006	78.1	cyclic-lactone-autoinducer	agrD-like cyclic lactone autoinducer peptides	88,254 - 101,283 nt	13,030 nt
F. prausnitzii CNCM I 4543	NZ_NMTT01000002	11.1	ranthipeptide	Cys-rich peptides	502,066 - 523,732 nt	21,667 nt
F. prausnitzii CNCM I 4542	NZ_NMTS02000001	1.1	ranthipeptide	Cys-rich peptides	547,970 - 569,633 nt	21,664 nt
	NZ_NMTS02000102	5.1	cyclic-lactone-autoinducer	agrD-like cyclic lactone autoinducer peptides	110,604 - 131,191 nt	20,588 nt
	NZ_NMTS02000059	61.1.	lassopeptide	Lasso peptide cluster	1 - 4,970 nt	4,970 nt
F. prausnitzii CNCM I 4544	NZ_NMTU01000012	5.1	cyclic-lactone-autoinducer	agrD-like cyclic lactone autoinducer peptides	1 - 14,218 nt	14,218 nt
	NZ_NMTU01000035	67.1	ranthipeptide	Cys-rich peptides	84,749 - 106,412 nt	21,664 nt
F. prausnitzii CNCM I 4546	NZ_NMTV01000157	56.1	RiPP-like	Other unspecified ribosomally synthesised and post-translationally modified peptide product (RiPP) cluster	1 - 1,209 nt	1,209 nt
	NZ_NMTV01000044	99.1	cyclic-lactone-autoinducer	agrD-like cyclic lactone autoinducer peptides	46,383 - 60,494 nt	14,112 nt
	NZ_NMTV01000071	111.1	ranthipeptide	Cys-rich peptides	106,988 - 128,653 nt	21,666 nt
	NZ_NMTV01000065	167.1	cyclic-lactone-autoinducer	agrD-like cyclic lactone autoinducer peptides	1 - 11,056 nt	11,056 nt
	NZ_NMTV01000032	196.1	cyclic-lactone-autoinducer	agrD-like cyclic lactone autoinducer peptides	1 - 2,995 nt	2,995 nt
	NZ_NMTV01000025	200.1	cyclic-lactone-autoinducer	agrD-like cyclic lactone autoinducer peptides	1 - 10,545 nt	10,545 nt
F. prausnitzii CNCM I 4573	NZ_NMTW01000020	7.1	cyclic-lactone-autoinducer	agrD-like cyclic lactone autoinducer peptides	58,545 - 74,141 nt	15,597 nt
	NZ_NMTW01000053	11.1	ranthipeptide	Cys-rich peptides	113,226 - 134,891 nt	21,666 nt
	NZ_NMTW01000026	33.1	cyclic-lactone-autoinducer	agrD-like cyclic lactone autoinducer peptides	6,551 - 27,138 nt	20,588 nt
F. prausnitzii CNCM I 4575	NZ_NMTY01000004	11.1	ranthipeptide	Cys-rich peptides	352,489 - 374,155 nt	21,667 nt
	NZ_NMTY01000013	15.1	cyclic-lactone-autoinducer	agrD-like cyclic lactone autoinducer peptides	1 - 9,656 nt	9,656 nt
	NZ_NMTY01000028	18.1	cyclic-lactone-autoinducer	agrD-like cyclic lactone autoinducer peptides	1 - 5,787 nt	5,787 nt
	NZ_NMTY01000035	21.1	lassopeptide	Lasso peptide cluster	1 - 4,762 nt	4,762 nt
	NZ_NMTY01000024	31.1	RRE-containing	RRE-element containing cluster	96,961 - 117,218 nt	20,258 nt
F. prausnitzii CNCM I 4574	NZ_NMTX01000008	11.1	ranthipeptide	Cys-rich peptides	210,057 - 231,723 nt	21,667 nt
		11.2	cyclic-lactone-autoinducer	agrD-like cyclic lactone autoinducer peptides	493,403 - 513,987 nt	20,585 nt
F. prausnitzii AHMP21	NZ_NOUV01000001	1.1	cyclic-lactone-autoinducer	agrD-like cyclic lactone autoinducer peptides	75,963 - 86,627 nt	10,665 nt
	NZ_NOUV01000011	3.1	ranthipeptide	Cys-rich peptides	79,198 - 100,864 nt	21,667 nt
	NZ_NOUV01000014	6.1	cyclic-lactone-autoinducer	agrD-like cyclic lactone autoinducer peptides	622,296 - 642,826 nt	20531 nt
	NZ_NOUV01000002	12.1	cyclic-lactone-autoinducer	agrD-like cyclic lactone autoinducer peptides	1 - 10,962 nt	10,962 nt
	NZ_NOUV01000005	27.1	RRE-containing	RRE-element containing cluster	351,166 - 371,432 nt	20,267 nt
F. prausnitzii AHMP21_GCA.002550045	NZ_NOUW01000017	9.1	ranthipeptide	Cys-rich peptides	253,292 - 274,958 nt	21,667 nt
	NZ_NOUW01000020	13.1	cyclic-lactone-autoinducer	agrD-like cyclic lactone autoinducer peptides	15,856 - 36,419 nt	20,564 nt
F. prausnitzii Indica	NZ_CP023819.1	1.1	ranthipeptide	Cys-rich peptides	388,307 - 409,973 nt	21,667 nt
F. prausnitzii A2165	NZ_CP022479.1	1.1	ranthipeptide	Cys-rich peptides	386,563 - 408,229 nt	21,667 nt
		1.2	cyclic-lactone-autoinducer	agrD-like cyclic lactone autoinducer peptides	1,102,150 - 1,121,439 nt	19,290 nt
		1.3	cyclic-lactone-autoinducer	agrD-like cyclic lactone autoinducer peptides	2,068,663 - 2,089,250 nt	20,588 nt
F. prausnitzii APC923/51-1	NZ_PRLD01000010	2.1	cyclic-lactone-autoinducer	agrD-like cyclic lactone autoinducer peptides	1 - 14,764 nt	14,764 nt
	NZ_PRLD01000030	31.1	RRE-containing	RRE-element containing cluster	1 - 6,339 nt	6,339 nt
	NZ_PRLD01000007	46.1	ranthipeptide	Cys-rich peptides	76,749 - 98,416 nt	21,668 nt
F. prausnitzii APC942/8-14-2	NZ_PRKZ01000001	11.1	ranthipeptide	Cys-rich peptides	374,680 - 396,338 nt	21,659 nt
	NZ_PRKZ01000002	15.1	RiPP-like	Other unspecified ribosomally synthesised and post-translationally modified peptide product (RiPP) cluster	327,950 - 340,271 nt	12,322 nt
	NZ_PRKZ01000008	21.1	cyclic-lactone-autoinducer	agrD-like cyclic lactone autoinducer peptides	129,802 - 147,289 nt	17,488 nt
F. prausnitzii APC922/41-1	NZ_PRLC01000027	22.1	cyclic-lactone-autoinducer	agrD-like cyclic lactone autoinducer peptides	1 - 14,331 nt	14,331 nt
	NZ_PRLC01000002	27.1	ranthipeptide	Cys-rich peptides	135,113 - 156,779 nt	21,667 nt
	NZ_PRLC01000003	31.1	cyclic-lactone-autoinducer	agrD-like cyclic lactone autoinducer peptides	187,165 - 208,644 nt	21,480 nt
	NZ_PRLC01000040	32.1	lassopeptide	Lasso peptide cluster	1 - 1,696 nt	1,696 nt
F. prausnitzii APC924/119	NZ_PRLF01000013	4.1	cyclic-lactone-autoinducer	agrD-like cyclic lactone autoinducer peptides	3,204 - 24,683 nt	21,480 nt
	NZ_PRLF01000001	11.1	ranthipeptide	Cys-rich peptides	333,564 - 355,229 nt	21,666 nt
	NZ_PRLF01000040	34.1	lantipeptide class II	Class II lanthipeptide clusters like mutacin II	1 - 7,795 nt	7,795 nt
	NZ_PRLF01000053	48.1	lassopeptide	Lasso peptide cluster	1 - 1,718 nt	1,718 nt
F. prausnitzii APC942/32-1	NZ_PRLB01000014	5.1	ranthipeptide	Cys-rich peptides	22,160 - 43,923 nt	21,764 nt
	NZ_PRLB01000001	11.1	RiPP-like	Other unspecified ribosomally synthesised and post-translationally modified peptide product (RiPP) cluster	118,137 - 130,476 nt	12,340 nt
F. prausnitzii APC923/61-1	NZ_PRLE01000015	6.1	lassopeptide	Lasso peptide cluster	1 - 1,727 nt	1,727 nt
	NZ_PRLE01000001	8.1	ranthipeptide	Cys-rich peptides	362,665 - 384,323 nt	21,659 nt
	NZ_PRLE01000002	9.1	RiPP-like	Other unspecified ribosomally synthesised and post-translationally modified peptide product (RiPP) cluster	227,271 - 239,592 nt	12,322 nt
	NZ_PRLE01000003	10.1	cyclic-lactone-autoinducer	agrD-like cyclic lactone autoinducer peptides	287,613 - 308,200 nt	20,588 nt
F. prausnitzii APC942/18-1	NZ_PRLA01000012	3.1	ranthipeptide	Cys-rich peptides	9,658 - 31,325 nt	21,668 nt
	NZ_PRLA01000002	14.1	cyclic-lactone-autoinducer	agrD-like cyclic lactone autoinducer peptides	92,406 - 112,993 nt	20,588 nt
	NZ_PRLA01000004	16.1	RiPP-like	Other unspecified ribosomally synthesised and post-translationally modified peptide product (RiPP) cluster	99,364 - 111,703 nt	12,340 nt
F. prausnitzii 942/30-2	NZ_CP026548.1	1.1	ranthipeptide	Cys-rich peptides	374,373 - 396,040 nt	21,668 nt
		1.2	cyclic-lactone-autoinducer	agrD-like cyclic lactone autoinducer peptides	1,544,184 - 1,564,771 nt	20,588 nt
		1.3	RiPP-like	Other unspecified ribosomally synthesised and post-translationally modified peptide product (RiPP) cluster	2,300,315 - 2,312,656 nt	12,342 nt
F. prausnitzii APC918/95b	NZ_CP030777.1	1.1	ranthipeptide	Cys-rich peptides	1,162,356 - 1,184,021 nt	21,666 nt
		1.2	cyclic-lactone-autoinducer	agrD-like cyclic lactone autoinducer peptides	2,899,707 - 2,922,842 nt	23,136 nt
F. prausnitzii ATCC 27766	NZ_PXUQ01000013	4.1	cyclic-lactone-autoinducer	agrD-like cyclic lactone autoinducer peptides	77,512 - 99,244 nt	21,733 nt
	NZ_PXUQ01000004	43.1	ranthipeptide	Cys-rich peptides	68,016 - 89,681 nt	21,666 nt
F. prausnitzii ATCC 27768	NZ_PXUP01000013	4.1	cyclic-lactone-autoinducer	agrD-like cyclic lactone autoinducer peptides	3,091 - 24,823 nt	21,733 nt
	NZ_PXUP01000004	42.1	ranthipeptide	Cys-rich peptides	68,016 - 89,681 nt	21,666 nt
	NZ_PXUP01000056	52.1	lassopeptide	Lasso peptide cluster	1 - 1,661 nt	1,661 nt
F. prausnitzii AF36-11AT	NZ_QVEQ01000001	1.1	ranthipeptide	Cys-rich peptides	125,691 - 147,357 nt	21,667 nt
	NZ_QVEQ01000038	32.1	cyclic-lactone-autoinducer	agrD-like cyclic lactone autoinducer peptides	1 - 4,778 nt	4,778 nt
	NZ_QVEQ01000044	39.1	cyclic-lactone-autoinducer	agrD-like cyclic lactone autoinducer peptides	1 - 3,773 nt	3,773 nt
	NZ_QVEQ01000005	45.1	cyclic-lactone-autoinducer	agrD-like cyclic lactone autoinducer peptides	1 - 13,304 nt	13,304 nt
F. prausnitzii AF31-14AC	NZ_QVES01000020	13.1	ranthipeptide	Cys-rich peptides	1 - 13,188 nt	13,188 nt
	NZ_QVES01000027	20.1	cyclic-lactone-autoinducer	agrD-like cyclic lactone autoinducer peptides	1 - 10,493 nt	10,493 nt
	NZ_QVES01000035	29.1	cyclic-lactone-autoinducer	agrD-like cyclic lactone autoinducer peptides	1 - 11,941 nt	11,941 nt
	NZ_QVES01000045	40.1	cyclic-lactone-autoinducer	agrD-like cyclic lactone autoinducer peptides	1 - 3,936 nt	3,936 nt
F. prausnitzii AF32-8AC	NZ_QVER01000002	12.1	RiPP-like	Other unspecified ribosomally synthesised and post-translationally modified peptide product (RiPP) cluster	46,492 - 58,831 nt	12,340 nt
	NZ_QVER01000024	17.1	cyclic-lactone-autoinducer	agrD-like cyclic lactone autoinducer peptides	1 - 14,714 nt	14,714 nt
	NZ_QVER01000003	23.1	ranthipeptide	Cys-rich peptides	190,986 - 212,653 nt	21,668 nt
	NZ_QVER01000038	32.1	cyclic-lactone-autoinducer	agrD-like cyclic lactone autoinducer peptides	1 - 3,605 nt	3,605 nt
	NZ_QVER01000009	49.1	cyclic-lactone-autoinducer	agrD-like cyclic lactone autoinducer peptides	107,392 - 127,432 nt	20,041 nt
F. prausnitzii AF29-11BH	NZ_QVEW01000001	1.1	ranthipeptide	Cys-rich peptides	403,340 - 425,005 nt	21,666 nt
	NZ_QVEW01000010	2.1	cyclic-lactone-autoinducer	agrD-like cyclic lactone autoinducer peptides	96,035 - 117,767 nt	21,733 nt
	NZ_QVEW01000013	5.1	cyclic-lactone-autoinducer	agrD-like cyclic lactone autoinducer peptides	4,658 - 25,439 nt	20,782 nt
	NZ_QVEW01000019	11.1	cyclic-lactone-autoinducer	agrD-like cyclic lactone autoinducer peptides	28,263 - 48,871 nt	20,609 nt
	NZ_QVEW01000002	12.1	cyclic-lactone-autoinducer	agrD-like cyclic lactone autoinducer peptides	250,736 - 268,880 nt	18,145 nt
F. prausnitzii AM42-11AC	NZ_QVEZ01000001	1.1	ranthipeptide	Cys-rich peptides	658,163 - 679,829 nt	21,667 nt
	NZ_QVEZ01000002	12.1	cyclic-lactone-autoinducer	agrD-like cyclic lactone autoinducer peptides	345,213 - 355,858 nt	10,646 nt
	NZ_QVEZ01000008	27.1	cyclic-lactone-autoinducer	agrD-like cyclic lactone autoinducer peptides	4,187 - 24,807 nt	20,621 nt
F. prausnitzii AM37-13AC	NZ_QVFB01000013	5.1	cyclic-lactone-autoinducer,lanthipeptide-class-ii	agrD-like cyclic lactone autoinducer peptides, Class II lanthipeptide clusters like mutacin II	73,954 - 97,206 nt	23,253 nt
	NZ_QVFB01000002	12.1	ranthipeptide	Cys-rich peptides	95,278 - 116,943 nt	21,666 nt
	NZ_QVFB01000028	21.1	cyclic-lactone-autoinducer	agrD-like cyclic lactone autoinducer peptides	1 - 13,827 nt	13,827 nt
	NZ_QVFB01000032	26.1	cyclic-lactone-autoinducer	agrD-like cyclic lactone autoinducer peptides	5,396 - 16,420 nt	11,025 nt
	NZ_QVFB01000033	27.1	cyclic-lactone-autoinducer	agrD-like cyclic lactone autoinducer peptides	1 - 13,139 nt	13,139 nt
F. prausnitzii AM39-7BH	NZ_QVFA01000010	2.1	cyclic-lactone-autoinducer	agrD-like cyclic lactone autoinducer peptides	99,465 - 120,085 nt	20,621 nt
	NZ_QVFA01000002	12.1	cyclic-lactone-autoinducer	agrD-like cyclic lactone autoinducer peptides	244,773 - 255,400 nt	10,628 nt
	NZ_QVFA01000004	34.1	lantipeptide class II	Class II lanthipeptide clusters like mutacin II	1 - 18,528 nt	18,528 nt
	NZ_QVFA01000007	37.1	cyclic-lactone-autoinducer	agrD-like cyclic lactone autoinducer peptides	1 - 12,547 nt	12,547 nt
		37.2	ranthipeptide	Cys-rich peptides	78,760 - 100,426 nt	21,667 nt
F. prausnitzii AM33-14AC	NZ_QVFC01000001	1.1	ranthipeptide	Cys-rich peptides	286,824 - 308,490 nt	21,667 nt
F. prausnitzii AF10-13	NZ_QSAW01000001	1.1	ranthipeptide	Cys-rich peptides	342,056 - 363,721 nt	21,666 nt
F. prausnitzii AM36-18BH	NZ_QSHX01000014	6.1	cyclic-lactone-autoinducer	agrD-like cyclic lactone autoinducer peptides	1 - 13,120 nt	13,120 nt
	NZ_QSHX01000002	12.1	ranthipeptide	Cys-rich peptides	355,735 - 377,400 nt	21,666 nt
	NZ_QSHX01000004	34.1	cyclic-lactone-autoinducer,RRE-containing	agrD-like cyclic lactone autoinducer peptides, RRE-element containing cluster	181,122 - 203,295 nt	22,174 nt
	NZ_QSHX01000008	40.1	cyclic-lactone-autoinducer	agrD-like cyclic lactone autoinducer peptides	86,770 - 106,110 nt	19,341 nt
F. prausnitzii aa_0143	NZ_RCYJ01000003	3.1	cyclic-lactone-autoinducer	agrD-like cyclic lactone autoinducer peptides	1 - 20,468 nt	20,468 nt
	NZ_RCYJ01000005	5.1	ranthipeptide	Cys-rich peptides	106,429 - 128,094 nt	21,666 nt
	NZ_RCYJ01000007	7.1	cyclic-lactone-autoinducer	agrD-like cyclic lactone autoinducer peptides	105,778 - 126,365 nt	20,588 nt
	NZ_RCYJ01000040	40.1	cyclic-lactone-autoinducer	agrD-like cyclic lactone autoinducer peptides	1 - 14,862 nt	14,862 nt
F. prausnitzii BIOML-B18	WKPV01000012.1	4.1	cyclic-lactone-autoinducer	agrD-like cyclic lactone autoinducer peptides	17,342 - 37,908 nt	20,567 nt
	WKPV01000004.1	46.1	cyclic-lactone-autoinducer	agrD-like cyclic lactone autoinducer peptides	122,221 - 142,784 nt	20,564 nt
	WKPV01000005.1	57.1	ranthipeptide	Cys-rich peptides	105,517 - 127,182 nt	21,666 nt
	WKPV01000006.1	58.1	cyclic-lactone-autoinducer	agrD-like cyclic lactone autoinducer peptides	105,778 - 126,365 nt	20,588 nt
F. prausnitzii BIOML-B17	NZ_WKPW01000006	59.1	cyclic-lactone-autoinducer	agrD-like cyclic lactone autoinducer peptides	6,687 - 27,250 nt	20,564 nt
	NZ_WKPW01000007	60.1	ranthipeptide	Cys-rich peptides	105,517 - 127,182 nt	21,666 nt
	NZ_WKPW01000008	61.1	cyclic-lactone-autoinducer	agrD-like cyclic lactone autoinducer peptides	106,816 - 127,403 nt	20,588 nt
F. prausnitzii BIOML-B14	NZ_WKPZ01000019	10.1	cyclic-lactone-autoinducer	agrD-like cyclic lactone autoinducer peptides	1 - 16,186 nt	16,186 nt
	NZ_WKPZ01000001	11.1	ranthipeptide	Cys-rich peptides	291,991 - 313,656 nt	21,666 nt
	NZ_WKPZ01000005	55.1	cyclic-lactone-autoinducer	agrD-like cyclic lactone autoinducer peptides	5,773 - 26,339 nt	20,567 nt
	NZ_WKPZ01000009	81.1	cyclic-lactone-autoinducer	agrD-like cyclic lactone autoinducer peptides	80,265 - 100,873 nt	20,609 nt
F. prausnitzii BIOML-B15	NZ_WKPY01000003	333.1	ranthipeptide	Cys-rich peptides	2,373 - 24,038 nt	21,666 nt
	NZ_WKPY01000080	426.1	cyclic-lactone-autoinducer	agrD-like cyclic lactone autoinducer peptides	1 - 4,925 nt	4,925 nt
F. prausnitzii BIOML-B16	NZ_WKPX01000032	98.1	cyclic-lactone-autoinducer	agrD-like cyclic lactone autoinducer peptides	21,302 - 35,113 nt	13,812 nt
	NZ_WKPX01000047	133.1	ranthipeptide	Cys-rich peptides	1 - 12,527 nt	12,527 nt
F. prausnitzii BIOML-B13	NZ_WKQA01000002	22.1	ranthipeptide	Cys-rich peptides	152,820 - 174,485 nt	21,666 nt
	NZ_WKQA01000048	42.1	cyclic-lactone-autoinducer	agrD-like cyclic lactone autoinducer peptides	1 - 8,245 nt	8,245 nt
	NZ_WKQA01000004	44.1	cyclic-lactone-autoinducer	agrD-like cyclic lactone autoinducer peptides	5,773 - 26,339 nt	20,567 nt
	NZ_WKQA01000008	64.1	cyclic-lactone-autoinducer	agrD-like cyclic lactone autoinducer peptides	80,265 - 100,873 nt	20,609 nt
F. prausnitzii BIOML-B12	NZ_WKQB01000001	11.1	ranthipeptide	Cys-rich peptides	291,991 - 313,656 nt	21,666 nt
	NZ_WKQB01000044	38.1	cyclic-lactone-autoinducer	agrD-like cyclic lactone autoinducer peptides	1 - 4,790 nt	4,790 nt
	NZ_WKQB01000004	44.1	cyclic-lactone-autoinducer	agrD-like cyclic lactone autoinducer peptides	5,973 - 26,539 nt	20,567 nt
	NZ_WKQB01000008	70.1	cyclic-lactone-autoinducer	agrD-like cyclic lactone autoinducer peptides	80,265 - 100,873 nt	20,609 nt
F. prausnitzii BIOML-B10	NZ_WKQD01000001	14.1	ranthipeptide	Cys-rich peptides	270,330 - 291,995 nt	21,666 nt
	NZ_WKQD01000033	29.1	cyclic-lactone-autoinducer	agrD-like cyclic lactone autoinducer peptides	1 - 17,453 nt	17,453 nt
	NZ_WKQD01000051	49.1	cyclic-lactone-autoinducer	agrD-like cyclic lactone autoinducer peptides	1 - 4,790 nt	4,790 nt
	NZ_WKQD01000008	91.1	cyclic-lactone-autoinducer	agrD-like cyclic lactone autoinducer peptides	81,500 - 102,108 nt	20,609 nt
F. prausnitzii BIOML-B11	NZ_WKQC01000001	11.1	ranthipeptide	Cys-rich peptides	291,991 - 313,656 nt	21,666 nt
	NZ_WKQC01000043	37.1	cyclic-lactone-autoinducer	agrD-like cyclic lactone autoinducer peptides	1 - 4,791 nt	4,791 nt
	NZ_WKQC01000004	44.1	cyclic-lactone-autoinducer	agrD-like cyclic lactone autoinducer peptides	5,973 - 26,539 nt	20,567 nt
	NZ_WKQC01000007	72.1	cyclic-lactone-autoinducer	agrD-like cyclic lactone autoinducer peptides	6,032 - 26,640 nt	20,609 nt
F. prausnitzii BIOML-B9	NZ_WKQE01000001	11.1	ranthipeptide	Cys-rich peptides	270,330 - 291,995 nt	21,666 nt
	NZ_WKQE01000032	25.1	cyclic-lactone-autoinducer	agrD-like cyclic lactone autoinducer peptides	13,338 - 33,904 nt	20,567 nt
	NZ_WKQE01000049	43.1	cyclic-lactone-autoinducer	agrD-like cyclic lactone autoinducer peptides	1 - 4,791 nt	4,791 nt
	NZ_WKQE01000054	49.1	lassopeptide	Lasso peptide cluster	1 - 5,351 nt	5,351 nt
	NZ_WKQE01000007	77.1	cyclic-lactone-autoinducer	agrD-like cyclic lactone autoinducer peptides	80,265 - 100,873 nt	20,609 nt
F. prausnitzii BIOML-B7	NZ_WKQI01000016	9.1	cyclic-lactone-autoinducer	agrD-like cyclic lactone autoinducer peptides	1 - 20,370 nt	20,370 nt
	NZ_WKQI01000001	13.1	ranthipeptide	Cys-rich peptides	292,178 - 313,843 nt	21,666 nt
	NZ_WKQI01000027	21.1	cyclic-lactone-autoinducer	agrD-like cyclic lactone autoinducer peptides	7,732 - 23,622 nt	15,891 nt
	NZ_WKQI01000008	81.1	cyclic-lactone-autoinducer	agrD-like cyclic lactone autoinducer peptides	80,265 - 100,873 nt	20,609 nt
F. prausnitzii BIOML-B8	NZ_WKQF01000002	23.1	ranthipeptide	Cys-rich peptides	152,821 - 174,486 nt	21,666 nt
	NZ_WKQF01000031	25.1	cyclic-lactone-autoinducer	agrD-like cyclic lactone autoinducer peptides	1 - 17,453 nt	17,453 nt
	NZ_WKQF01000047	42.1	cyclic-lactone-autoinducer	agrD-like cyclic lactone autoinducer peptides	1 - 4,791 nt	4,791 nt
	NZ_WKQF01000006	67.1	cyclic-lactone-autoinducer	agrD-like cyclic lactone autoinducer peptides	80,265 - 100,873 nt	20,609 nt
F. prausnitzii BIOML-B6	NZ_WKQH01000016	16.1	cyclic-lactone-autoinducer	agrD-like cyclic lactone autoinducer peptides	1 - 20,577 nt	20,577 nt
	NZ_WKQH01000001	21.1	ranthipeptide	Cys-rich peptides	292,178 - 313,843 nt	21,666 nt
	NZ_WKQH01000032	35.1	cyclic-lactone-autoinducer	agrD-like cyclic lactone autoinducer peptides	7,732 - 23,622 nt	15,891 nt
	NZ_WKQH01000007	87.1	cyclic-lactone-autoinducer	agrD-like cyclic lactone autoinducer peptides	80,265 - 100,873 nt	20,609 nt
F. prausnitzii BIOML-B4	NZ_WKQJ01000021	14.1	cyclic-lactone-autoinducer	agrD-like cyclic lactone autoinducer peptides	35,824 - 51,765 nt	15,942 nt
	NZ_WKQJ01000002	23.1	cyclic-lactone-autoinducer	agrD-like cyclic lactone autoinducer peptides	1 - 20,468 nt	20,468 nt
	NZ_WKQJ01000005	56.1	ranthipeptide	Cys-rich peptides	134,964 - 156,629 nt	21,666 nt
F. prausnitzii BIOML-B2	NZ_WKQL01000018	13.1	cyclic-lactone-autoinducer	agrD-like cyclic lactone autoinducer peptides	72,298 - 89,812 nt	17,515 nt
	NZ_WKQL01000027	23.1	cyclic-lactone-autoinducer	agrD-like cyclic lactone autoinducer peptides	21,296 - 36,653 nt	15,358 nt
	NZ_WKQL01000030	27.1	lassopeptide	Lasso peptide cluster	1 - 14,267 nt	14,267 nt
	NZ_WKQL01000004	48.1	cyclic-lactone-autoinducer	agrD-like cyclic lactone autoinducer peptides	122,211 - 142,678 nt	20,468 nt
	NZ_WKQL01000006	70.1	ranthipeptide	Cys-rich peptides	106,351 - 128,016 nt	21,666 nt
F. prausnitzii BIOML-B3	NZ_WKQK01000038	31.1	cyclic-lactone-autoinducer	agrD-like cyclic lactone autoinducer peptides	1 - 14,862 nt	14,862 nt
	NZ_WKQK01000003	33.1	cyclic-lactone-autoinducer	agrD-like cyclic lactone autoinducer peptides	1 - 20,468 nt	20,468 nt
	NZ_WKQK01000005	55.1	ranthipeptide	Cys-rich peptides	106,429 - 128,094 nt	21,666 nt
	NZ_WKQK01000007	77.1	cyclic-lactone-autoinducer	agrD-like cyclic lactone autoinducer peptides	105,778 - 126,365 nt	20,588 nt
F. prausnitzii BIOML-B1	NZ_WKQM01000023	33.1	ranthipeptide	Cys-rich peptides	10,471 - 32,145 nt	21,675 nt
	NZ_WKQM01000043	55.1	cyclic-lactone-autoinducer	agrD-like cyclic lactone autoinducer peptides	1 - 10,665 nt	10,665 nt
	NZ_WKQM01000009	117.1	cyclic-lactone-autoinducer	agrD-like cyclic lactone autoinducer peptides	92,818 - 103,908 nt	11,091 nt
F. prausnitzii BIOML-A1	NZ_WKQN01000015	6.1	cyclic-lactone-autoinducer	agrD-like cyclic lactone autoinducer peptides	39,476 - 60,956 nt	21,481 nt
	NZ_WKQN01000001	11.1	RiPP-like	Other unspecified ribosomally synthesised and post-translationally modified peptide product (RiPP) cluster	167,133 - 178,173 nt	11,041 nt
		11.2	ranthipeptide	Cys-rich peptides	342,399 - 364,065 nt	21,667 nt
	NZ_WKQN01000024	16.1	cyclic-lactone-autoinducer	agrD-like cyclic lactone autoinducer peptides	1 - 9,605 nt	9,605 nt
F. prausnitzii JCM 31915	NZ_CP048437.1	1.1	cyclic-lactone-autoinducer	agrD-like cyclic lactone autoinducer peptides	685,014 - 704,304 nt	19,291 nt
		1.2	ranthipeptide	Cys-rich peptides	1,398,077 - 1,419,743 nt	21,667 nt
		1.3	cyclic-lactone-autoinducer	agrD-like cyclic lactone autoinducer peptides	2,819,705 - 2,840,292 nt	20,588 nt
F. prausnitzii SSTS_Bg7063	c00010_NZ_CABHNC010000011.1	10.1	cyclic-lactone-autoinducer	agrD-like cyclic lactone autoinducer peptides	1 - 1,674 nt	1,674 nt
	c00015_NZ_CABHNC010000016.1	15.1	RiPP-like	Other unspecified ribosomally synthesised and post-translationally modified peptide product (RiPP) cluster	4,685 - 14,283 nt	9,599 nt
	c00140_NZ_CABHNC010000167.1	140.1	ranthipeptide	Cys-rich peptides	1 - 10,556 nt	10,556 nt
F. prausnitzii JG_BgPS064	c00008_NZ_CABHMY010000086.1	8.1	ranthipeptide	Cys-rich peptides	37,080 - 58,747 nt	21,668 nt
	c00022_NZ_CABHMY010000100.1	22.1	RiPP-like	Other unspecified ribosomally synthesised and post-translationally modified peptide product (RiPP) cluster	246,020 - 258,356 nt	12,337 nt
	c00041_NZ_CABHMY010000177.1	41.1	cyclic-lactone-autoinducer	agrD-like cyclic lactone autoinducer peptides	34,702 - 55,304 nt	20,603 nt
F. prausnitzii FPSSTS7063_SV_a2_mod	c00015_NZ_CABHNO010000015.1	15.1	RiPP-like	Other unspecified ribosomally synthesised and post-translationally modified peptide product (RiPP) cluster	1 - 8,366 nt	8,366 nt
		15.2	cyclic-lactone-autoinducer	agrD-like cyclic lactone autoinducer peptides	11,566 - 32,129 nt	20,564 nt
	c00035_NZ_CABHNO010000045.1	35.1	ranthipeptide	Cys-rich peptides	22,085 - 43,752 nt	21,668 nt
	c00036_NZ_CABHNO010000046.1	36.1	cyclic-lactone-autoinducer	agrD-like cyclic lactone autoinducer peptides	13,728 - 34,330 nt	20,603 nt
F. prausnitzii MGYG-HGUT-00022	c00003_NZ_CABIWR010000003.1	3.1	ranthipeptide	Cys-rich peptides	351,772 - 373,438 nt	21,667 nt
	c00006_NZ_CABIWR010000006.1	6.1	cyclic-lactone-autoinducer	agrD-like cyclic lactone autoinducer peptides	73,769 - 95,248 nt	21,480 nt
	c00010_NZ_CABIWR010000010.1	10.1	lassopeptide	Lasso peptide cluster	1 - 10,450 nt	10,450 nt
		10.2	cyclic-lactone-autoinducer	agrD-like cyclic lactone autoinducer peptides	22,567 - 43,187 nt	20,621 nt
F. prausnitzii MGYG-HGUT-00039	c00001_NZ_CABIWV010000001.1	1.1	ranthipeptide	Cys-rich peptides	124,530 - 146,196 nt	21,667 nt
	c00008_NZ_CABIWV010000008.1	8.1	cyclic-lactone-autoinducer	agrD-like cyclic lactone autoinducer peptides	90,837 - 112,316 nt	21,480 nt
F. prausnitzii MGYG-HGUT-00195	c00003_NZ_CABJDF010000003.1	3.1	cyclic-lactone-autoinducer	agrD-like cyclic lactone autoinducer peptides	327,223 - 344,764 nt	17,542 nt
	c00005_NZ_CABJDF010000005.1	5.1	ranthipeptide	Cys-rich peptides	209,027 - 230,693 nt	21,667 nt
	c00014_NZ_CABJDF010000014.1	14.1	cyclic-lactone-autoinducer	agrD-like cyclic lactone autoinducer peptides	1 - 12,784 nt	12,784 nt
F. prausnitzii MGYG-HGUT-01300	c00001_NZ_CABKNH010000001.1	1.1	ranthipeptide	Cys-rich peptides	438,197 - 459,862 nt	21,666 nt
	c00003_NZ_CABKNH010000003.1	3.1	cyclic-lactone-autoinducer	agrD-like cyclic lactone autoinducer peptides	127,440 - 148,027 nt	20,588 nt
F. prausnitzii MGYG-HGUT-02272	c00003_NZ_CABMES010000003.1	3.1	ranthipeptide	Cys-rich peptides	89,968 - 111,632 nt	21,665 nt
		3.2	RiPP-like	Other unspecified ribosomally synthesised and post-translationally modified peptide product (RiPP) cluster	157,469 - 168,509 nt	11,041 nt
F. prausnitzii MGYG-HGUT-02274	c00018_NZ_CABMFC010000018.1	18.1	RRE-containing	RRE-element containing cluster	8,108 - 28,497 nt	20,390 nt
F. prausnitzii MGYG-HGUT-02545	NZ_LR699017.1	1.1	ranthipeptide	Cys-rich peptides	374,373 - 396,040 nt	21,668 nt
		1.2	cyclic-lactone-autoinducer	agrD-like cyclic lactone autoinducer peptides	1,544,184 - 1,564,771 nt	20,588 nt
		1.3	RiPP-like	Other unspecified ribosomally synthesised and post-translationally modified peptide product (RiPP) cluster	2,300,315 - 2,312,654 nt	12,340 nt
F. prausnitzii P9225	NZ_LR700078.1	13.1	ranthipeptide	Cys-rich peptides	200,612 - 222,278 nt	21,667 nt
	NZ_LR700082.1	22.1	cyclic-lactone-autoinducer	agrD-like cyclic lactone autoinducer peptides	38,961 - 60,440 nt	21,480 nt
F. prausnitzii P9240	c00002_NZ_CABVEL010000002.1	2.1	ranthipeptide	Cys-rich peptides	297,239 - 318,905 nt	21,667 nt
F. prausnitzii P9313	c00001_NZ_CABVEN010000001.1	1.1	ranthipeptide	Cys-rich peptides	297,245 - 319,034 nt	21,790 nt
F. prausnitzii P9094	NZ_LR700171.1	4.1	cyclic-lactone-autoinducer	agrD-like cyclic lactone autoinducer peptides	1 - 15,507 nt	15,507 nt
	NZ_LR700152.1	7.1	ranthipeptide	Cys-rich peptides	570,104 - 591,770 nt	21,667 nt
	NZ_LR700177.1	14.1	cyclic-lactone-autoinducer	agrD-like cyclic lactone autoinducer peptides	1 - 5,023 nt	5,023 nt
	NZ_LR700164.1	31.1	cyclic-lactone-autoinducer	agrD-like cyclic lactone autoinducer peptides	10,330 - 31,111 nt	20,782 nt
F. prausnitzii P9238	NZ_LR699986.1	16.1	cyclic-lactone-autoinducer	agrD-like cyclic lactone autoinducer peptides	1 - 15,507 nt	15,507 nt
	NZ_LR699966.1	19.1	ranthipeptide	Cys-rich peptides	34,019 - 55,685 nt	21,667 nt
	NZ_LR699992.1	29.1	cyclic-lactone-autoinducer	agrD-like cyclic lactone autoinducer peptides	1 - 5,023 nt	5,023 nt
	NZ_LR699993.1	30.1	lassopeptide	Lasso peptide cluster	1 - 4,805 nt	4,805 nt
	NZ_LR699977.1	41.1	cyclic-lactone-autoinducer	agrD-like cyclic lactone autoinducer peptides	10,330 - 31,111 nt	20,782 nt
F. prausnitzii P9239	c00003NZ_CABVEU010000003.1	3.1	ranthipeptide	Cys-rich peptides	6,872 - 28,538 nt	21,667 nt
F. prausnitzii P9311	NZ_LR700104.1	11.1	ranthipeptide	Cys-rich peptides	159,658 - 181,324 nt	21,667 nt
		11.1	cyclic-lactone-autoinducer	agrD-like cyclic lactone autoinducer peptides	245,612 - 258,668 nt	13,057 nt
	NZ_LR700120.1	30.1	cyclic-lactone-autoinducer	agrD-like cyclic lactone autoinducer peptides	11,189 - 31,791 nt	20,603 nt
F. prausnitzii P9391	c00001_NZ_CABVEO010000001.1	1.1	ranthipeptide	Cys-rich peptides	801,302 - 822,968 nt	21,667 nt
F. prausnitzii P9241	NZ_LR699927.1	9.1	ranthipeptide	Cys-rich peptides	297,245 - 318,911 nt	21,667 nt
	NZ_LR699953.1	18.1	lassopeptide	Lasso peptide cluster	1 - 4,635 nt	4,635 nt
F. prausnitzii P9224	NZ_LR700049.1	1.1	cyclic-lactone-autoinducer	agrD-like cyclic lactone autoinducer peptides	1 - 10,760 nt	10,760 nt
	NZ_LR700014.1	13.1	cyclic-lactone-autoinducer	agrD-like cyclic lactone autoinducer peptides	125,735 - 146,322 nt	20,588 nt
	NZ_LR700031.1	36.1	ranthipeptide	Cys-rich peptides	12,424 - 34,186 nt	21,763 nt
	NZ_LR700063.1	50.1	lassopeptide	Lasso peptide cluster	1 - 4,605 nt	4,605 nt
F. prausnitzii P9123	c00001_NZ_CABVEJ010000001.1	1.1	cyclic-lactone-autoinducer	agrD-like cyclic lactone autoinducer peptides	1,189,745 - 1,210,332 nt	20,588 nt
		1.2	ranthipeptide	Cys-rich peptides	1,276,925 - 1,298,591 nt	21,667 nt
	c00002_NZ_CABVEL010000002.1	2.1	cyclic-lactone-autoinducer,RRE-containing	agrD-like cyclic lactone autoinducer peptides, RRE-element containing cluster	287,294 - 309,467 nt	22,174 nt
F. prausnitzii P9122	c00003_NZ_CABVEM010000003.1	3.1	ranthipeptide	Cys-rich peptides	47,340 - 69,006 nt	21,667 nt
	c00007_NZ_CABVEM010000007.1	7.1	cyclic-lactone-autoinducer,RRE-containing	agrD-like cyclic lactone autoinducer peptides, RRE-element containing cluster	194,068 - 216,241 nt	22,174 nt

## Sheet: Table9
Supplementary Table 9: Fatty acid synthesis related enzymes in F. prausnitzii
K number	Enzyme Entry	Enzyme Name
K01897	6.2.1.3	ACSL, fadD
K00059	1.1.1.100	FabG
K00248	1.3.8.1	acyl-CoA dehydrogenase
k09458	2.3.1.179	FabF、OXSM
K00626	2.3.1.9	acetyl-CoA C-acetyltransferase
K00645	2.3.1.39	FabD
K00648	2.3.1.180	FabH、FabY
K01962	6.4.1.2	accA
K02371	1.3.1.9	FabK
K01963	6.4.1.2	accD
K02372	4.2.1.59	FabZ
K00208	1.3.1.9	FabI
K01961	6.4.1.2	accC
K16363	4.2.1.59	IpxC-FabZ

[truncated: 10 more sheets: Table10, Table11, Table12, Table13, Table14, Table15, Table16, Table17, Table18, Table19]
